# Supplementary material for: Identification and Validation of miR-222-3p and miR-409-3p as Plasma Biomarkers in Gestational Diabetes Mellitus Sharing Validated Target Genes Involved in Metabolic Homeostasis
Source: MDPI journal article supplement (doi:10.3390/ijms23084276), 2022-04-12
Supplement: s1 [file s1]

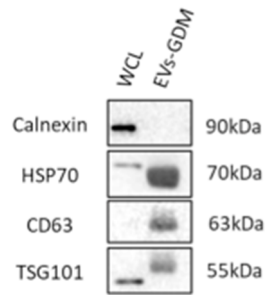

**Figure S1.** Characterisation of extracellular vesicles (EVs) plasma derived. Western blotting analysis of Calnexin, checked as negative marker; Tsg101, CD63 and Hsp70 EVs-enriched markers. WCL, whole cell lysate; EVs-GDM, gestational diabetes mellitus (GDM) plasma-derived extracellular vesicles (EVs).
