# Supplementary material for: Identification and Validation of miR-222-3p and miR-409-3p as Plasma Biomarkers in Gestational Diabetes Mellitus Sharing Validated Target Genes Involved in Metabolic Homeostasis
Source: Int J Mol Sci. 2022 Apr 12;23(8):4276. doi: 10.3390/ijms23084276 (PMC9028517; doi:10.3390/ijms23084276)
Supplement: Supplementary file 1 [file ijms-23-04276-s001.zip › Supplementary Tables S1-5.xlsx]

## Sheet: Table S1
Table S1. Assay ID of microRNAs used for validation analysis in RT-qPCR in EVs and TP samples
	microRNA	Assay ID
EVs	hsa-miR-518e*	2371
	hsa-miR-548N	2888
	hsa-miR-302b	531
	hsa-miR-16-5p	391
	hsa-miR-106a-5p	2169
	hsa-miR-19b-3p	396
	hsa-miR-20a-5p	580
	hsa-miR-20b-5p	1014
	hsa-miR-let7b-5p	2619
	hsa-miR-93-5p	1090
	hsa-miR-19a-3p	395
	mml-miR-26b-5p	407
	hsa-miR-302d-3p	535
	hsa-miR-520f-5p	1120
	hsa-miR-144-3p	197373_mat
	hsa-miR-548z	465137_mat
TP	hsa-miR-941	2183
	hsa-miR-625	2431
	hsa-miR-409-3p	2332
	hsa-miR-382	572
	hsa-miR-432-5p	1026
	hsa-miR-330	544
	hsa-miR-302d-3p	535
	hsa-miR-222-3p	2276
	hsa-miR-888-5p	2212
	hsa-miR-502-5p	1109
EVs and TP	U6 snRNA	1973
	ath-miR-159a	338

## Sheet: Table S2
Table S2. TP MicroRNAs displaying significantly differential expression in GDM vs NGT.
microRNA	Fold change (FC)	P-value	Expression in GDM
hsa-miR-874-3p	2.02361	0.004804	Upregulated
hsa-miR-625-5p	1.98976	0.007194
hsa-miR-6721-5p	1.65223	0.01219
hsa-miR-409-3p	1.94235	0.021078
hsa-miR-337-5p	1.56919	0.021222
hsa-miR-432-5p	1.71087	0.025445
hsa-miR-222-3p	1.5399	0.027951
hsa-miR-302d-3p	1.54033	0.037356
hsa-miR-323a-3p	1.57519	0.038848
hsa-miR-382-5p	1.80159	0.043585
hsa-miR-197-5p	1.56335	0.044774
hsa-miR-941	-2.00021	0.01561	Downregulated

## Sheet: Table S3
Table S3. EVs microRNAs displaying significantly differential expression in GDM vs NGT.
microRNA	Fold change (FC)	P-value	Expression in GDM
hsa-miR-627-5p	-4.12076	4.24e-21	Downregulated
hsa-miR-548j-3p	-3.86171	2.26e-19
hsa-miR-519b-5p+hsa-miR-519c-5p+hsa-miR-523-5p+hsa-miR-518e-5p+hsa-miR-522-5p+hsa-miR-519a-5p	-3.31149	1.39e-15
hsa-miR-1297	-2.52589	5.91e-10
hsa-miR-548n	-2.4452	2.27e-09
hsa-miR-302b-3p	-2.3559	1.01e-08
hsa-miR-16-5p	-2.19514	1.45e-07
hsa-miR-4531	-2.16666	2.31e-07
hsa-miR-1290	-2.13053	4.19e-07
hsa-miR-522-3p	-2.12672	4.46e-07
hsa-miR-451a	-2.12274	4.76e-07
hsa-let-7b-5p	-2.12163	4.85e-07
hsa-miR-548z+hsa-miR-548h-3p	-2.0696	1.13e-06
hsa-miR-106a-5p+hsa-miR-17-5p	-2.02841	2.22e-06
hsa-miR-19b-3p	-1.95632	7.08e-06
hsa-miR-944	-1.94565	8.39e-06
hsa-miR-20a-5p+hsa-miR-20b-5p	-1.91476	1.37e-05
hsa-miR-216b-5p	-1.91063	1.47e-05
hsa-miR-4455	-1.89593	1.85e-05
hsa-miR-561-5p	-1.88103	2.34e-05
hsa-miR-144-3p	-1.87449	2.6e-05
hsa-miR-548j-5p	-1.83426	4.88e-05
hsa-miR-548ar-5p	-1.81753	6.33e-05
hsa-miR-644a	-1.81146	6.95e-05
hsa-miR-93-5p	-1.80329	7.89e-05
hsa-miR-548aa+hsa-miR-548t-3p	-1.79131	9.5e-05
hsa-miR-548ai+hsa-miR-570-5p	-1.77324	0.000125
hsa-miR-19a-3p	-1.76714	0.000138
hsa-miR-520h	-1.62992	0.001067
hsa-miR-26b-5p	-1.61174	0.001388
hsa-miR-499a-3p	-1.60695	0.001487
hsa-miR-513b-5p	-1.59778	0.001696
hsa-miR-25-3p	-1.57142	0.002464
hsa-miR-155-5p	-1.55878	0.002943
hsa-miR-590-5p	-1.55692	0.00302
hsa-miR-30e-5p	-1.52978	0.0044
hsa-miR-106b-5p	-1.51268	0.005558

## Sheet: Table S4
Table S4. hsa-miR-222-3p expression in all cell types across the human body as reported by the FANTOM5 consortium
MiRNA	miRNA_ID	Description	Location
hsa-miR-222-3p	MIMAT0000279	Adipocyte - breast, donor1	hg19::chrX:45606421..45606530-
hsa-miR-222-3p	MIMAT0000279	Adipocyte - breast, donor2	hg19::chrX:45606421..45606530-
hsa-miR-222-3p	MIMAT0000279	Adipocyte - omental, donor1	hg19::chrX:45606421..45606530-
hsa-miR-222-3p	MIMAT0000279	Adipocyte - omental, donor2	hg19::chrX:45606421..45606530-
hsa-miR-222-3p	MIMAT0000279	Adipocyte - omental, donor3	hg19::chrX:45606421..45606530-
hsa-miR-222-3p	MIMAT0000279	Adipocyte - perirenal, donor1	hg19::chrX:45606421..45606530-
hsa-miR-222-3p	MIMAT0000279	Adipocyte - subcutaneous, donor1	hg19::chrX:45606421..45606530-
hsa-miR-222-3p	MIMAT0000279	Adipocyte - subcutaneous, donor2	hg19::chrX:45606421..45606530-
hsa-miR-222-3p	MIMAT0000279	Adipocyte - subcutaneous, donor3	hg19::chrX:45606421..45606530-
hsa-miR-222-3p	MIMAT0000279	Alveolar Epithelial Cells, donor1	hg19::chrX:45606421..45606530-
hsa-miR-222-3p	MIMAT0000279	Alveolar Epithelial Cells, donor2	hg19::chrX:45606421..45606530-
hsa-miR-222-3p	MIMAT0000279	Alveolar Epithelial Cells, donor3	hg19::chrX:45606421..45606530-
hsa-miR-222-3p	MIMAT0000279	Amniotic Epithelial Cells, donor1	hg19::chrX:45606421..45606530-
hsa-miR-222-3p	MIMAT0000279	Amniotic Epithelial Cells, donor2	hg19::chrX:45606421..45606530-
hsa-miR-222-3p	MIMAT0000279	Amniotic Epithelial Cells, donor3	hg19::chrX:45606421..45606530-
hsa-miR-222-3p	MIMAT0000279	amniotic membrane cells, donor3	hg19::chrX:45606421..45606530-
hsa-miR-222-3p	MIMAT0000279	Anulus Pulposus Cell, donor1	hg19::chrX:45606421..45606530-
hsa-miR-222-3p	MIMAT0000279	Anulus Pulposus Cell, donor2	hg19::chrX:45606421..45606530-
hsa-miR-222-3p	MIMAT0000279	Astrocyte - cerebellum, donor1	hg19::chrX:45606421..45606530-
hsa-miR-222-3p	MIMAT0000279	Astrocyte - cerebellum, donor3	hg19::chrX:45606421..45606530-
hsa-miR-222-3p	MIMAT0000279	Astrocyte - cerebral cortex, donor1	hg19::chrX:45606421..45606530-
hsa-miR-222-3p	MIMAT0000279	Astrocyte - cerebral cortex, donor2	hg19::chrX:45606421..45606530-
hsa-miR-222-3p	MIMAT0000279	Astrocyte - cerebral cortex, donor3	hg19::chrX:45606421..45606530-
hsa-miR-222-3p	MIMAT0000279	Bronchial Epithelial Cell, donor1	hg19::chrX:45606421..45606530-
hsa-miR-222-3p	MIMAT0000279	Bronchial Epithelial Cell, donor2	hg19::chrX:45606421..45606530-
hsa-miR-222-3p	MIMAT0000279	Bronchial Epithelial Cell, donor4	hg19::chrX:45606421..45606530-
hsa-miR-222-3p	MIMAT0000279	CD14+ monocyte derived endothelial progenitor cells, donor1	hg19::chrX:45606421..45606530-
hsa-miR-222-3p	MIMAT0000279	CD14+ monocyte derived endothelial progenitor cells, donor2	hg19::chrX:45606421..45606530-
hsa-miR-222-3p	MIMAT0000279	CD14+ monocyte derived endothelial progenitor cells, donor3	hg19::chrX:45606421..45606530-
hsa-miR-222-3p	MIMAT0000279	CD14+ monocytes - treated with BCG, donor4	hg19::chrX:45606421..45606530-
hsa-miR-222-3p	MIMAT0000279	CD14+ Monocytes, donor1	hg19::chrX:45606421..45606530-
hsa-miR-222-3p	MIMAT0000279	CD14+ Monocytes, donor2	hg19::chrX:45606421..45606530-
hsa-miR-222-3p	MIMAT0000279	CD14+ Monocytes, donor3	hg19::chrX:45606421..45606530-
hsa-miR-222-3p	MIMAT0000279	CD19+ B Cells, donor1	hg19::chrX:45606421..45606530-
hsa-miR-222-3p	MIMAT0000279	CD19+ B Cells, donor2	hg19::chrX:45606421..45606530-
hsa-miR-222-3p	MIMAT0000279	CD19+ B Cells, donor3	hg19::chrX:45606421..45606530-
hsa-miR-222-3p	MIMAT0000279	CD19+ B Lymphocytes (cytosolic)	hg19::chrX:45606421..45606530-
hsa-miR-222-3p	MIMAT0000279	CD19+ B Lymphocytes (nuclear)	hg19::chrX:45606421..45606530-
hsa-miR-222-3p	MIMAT0000279	CD3+ T Lymphocytes (cytosolic)	hg19::chrX:45606421..45606530-
hsa-miR-222-3p	MIMAT0000279	CD3+ T Lymphocytes (nuclear)	hg19::chrX:45606421..45606530-
hsa-miR-222-3p	MIMAT0000279	CD4+ T Cells, donor1	hg19::chrX:45606421..45606530-
hsa-miR-222-3p	MIMAT0000279	CD4+ T Cells, donor2	hg19::chrX:45606421..45606530-
hsa-miR-222-3p	MIMAT0000279	CD4+ T Cells, donor3	hg19::chrX:45606421..45606530-
hsa-miR-222-3p	MIMAT0000279	CD8+ T Cells, donor1	hg19::chrX:45606421..45606530-
hsa-miR-222-3p	MIMAT0000279	CD8+ T Cells, donor2	hg19::chrX:45606421..45606530-
hsa-miR-222-3p	MIMAT0000279	CD8+ T Cells, donor3	hg19::chrX:45606421..45606530-
hsa-miR-222-3p	MIMAT0000279	Chondrocyte - de diff, donor1	hg19::chrX:45606421..45606530-
hsa-miR-222-3p	MIMAT0000279	Chondrocyte - de diff, donor2	hg19::chrX:45606421..45606530-
hsa-miR-222-3p	MIMAT0000279	Chondrocyte - de diff, donor3	hg19::chrX:45606421..45606530-
hsa-miR-222-3p	MIMAT0000279	Chondrocyte - re diff, donor1	hg19::chrX:45606421..45606530-
hsa-miR-222-3p	MIMAT0000279	Chondrocyte - re diff, donor2	hg19::chrX:45606421..45606530-
hsa-miR-222-3p	MIMAT0000279	Chondrocyte - re diff, donor3	hg19::chrX:45606421..45606530-
hsa-miR-222-3p	MIMAT0000279	chorionic membrane cells, donor3	hg19::chrX:45606421..45606530-
hsa-miR-222-3p	MIMAT0000279	Ciliary Epithelial Cells, donor1	hg19::chrX:45606421..45606530-
hsa-miR-222-3p	MIMAT0000279	Ciliary Epithelial Cells, donor2	hg19::chrX:45606421..45606530-
hsa-miR-222-3p	MIMAT0000279	Ciliary Epithelial Cells, donor3	hg19::chrX:45606421..45606530-
hsa-miR-222-3p	MIMAT0000279	COBL-a rinderpest infection, 00hr, biol_rep1	hg19::chrX:45606421..45606530-
hsa-miR-222-3p	MIMAT0000279	COBL-a rinderpest infection, 00hr, biol_rep2	hg19::chrX:45606421..45606530-
hsa-miR-222-3p	MIMAT0000279	COBL-a rinderpest infection, 00hr, biol_rep3	hg19::chrX:45606421..45606530-
hsa-miR-222-3p	MIMAT0000279	COBL-a rinderpest infection, 24hr, biol_rep1	hg19::chrX:45606421..45606530-
hsa-miR-222-3p	MIMAT0000279	COBL-a rinderpest infection, 24hr, biol_rep2	hg19::chrX:45606421..45606530-
hsa-miR-222-3p	MIMAT0000279	COBL-a rinderpest infection, 24hr, biol_rep3	hg19::chrX:45606421..45606530-
hsa-miR-222-3p	MIMAT0000279	COBL-a rinderpest(-C) infection, 24hr, biol_rep1	hg19::chrX:45606421..45606530-
hsa-miR-222-3p	MIMAT0000279	COBL-a rinderpest(-C) infection, 24hr, biol_rep2	hg19::chrX:45606421..45606530-
hsa-miR-222-3p	MIMAT0000279	COBL-a rinderpest(-C) infection, 24hr, biol_rep3	hg19::chrX:45606421..45606530-
hsa-miR-222-3p	MIMAT0000279	Corneal Epithelial Cells, donor1	hg19::chrX:45606421..45606530-
hsa-miR-222-3p	MIMAT0000279	Corneal Epithelial Cells, donor2	hg19::chrX:45606421..45606530-
hsa-miR-222-3p	MIMAT0000279	Corneal Epithelial Cells, donor3	hg19::chrX:45606421..45606530-
hsa-miR-222-3p	MIMAT0000279	Dendritic Cells - monocyte immature derived, donor1	hg19::chrX:45606421..45606530-
hsa-miR-222-3p	MIMAT0000279	Dendritic Cells - monocyte immature derived, donor2	hg19::chrX:45606421..45606530-
hsa-miR-222-3p	MIMAT0000279	Dendritic Cells - monocyte immature derived, donor3	hg19::chrX:45606421..45606530-
hsa-miR-222-3p	MIMAT0000279	Embryonic Stem cell (cytosolic)	hg19::chrX:45606421..45606530-
hsa-miR-222-3p	MIMAT0000279	Embryonic Stem cell (cytosolic)	hg19::chrX:45606421..45606530-
hsa-miR-222-3p	MIMAT0000279	Embryonic Stem cell (cytosolic)	hg19::chrX:45606421..45606530-
hsa-miR-222-3p	MIMAT0000279	Embryonic Stem cell (nuclear)	hg19::chrX:45606421..45606530-
hsa-miR-222-3p	MIMAT0000279	Embryonic Stem cell (nuclear)	hg19::chrX:45606421..45606530-
hsa-miR-222-3p	MIMAT0000279	Embryonic Stem cell (nuclear)	hg19::chrX:45606421..45606530-
hsa-miR-222-3p	MIMAT0000279	Endothelial Cells - Aortic, donor0	hg19::chrX:45606421..45606530-
hsa-miR-222-3p	MIMAT0000279	Endothelial Cells - Aortic, donor1	hg19::chrX:45606421..45606530-
hsa-miR-222-3p	MIMAT0000279	Endothelial Cells - Aortic, donor2	hg19::chrX:45606421..45606530-
hsa-miR-222-3p	MIMAT0000279	Endothelial Cells - Aortic, donor3	hg19::chrX:45606421..45606530-
hsa-miR-222-3p	MIMAT0000279	Endothelial Cells - Artery, donor1	hg19::chrX:45606421..45606530-
hsa-miR-222-3p	MIMAT0000279	Endothelial Cells - Artery, donor2	hg19::chrX:45606421..45606530-
hsa-miR-222-3p	MIMAT0000279	Endothelial Cells - Artery, donor3	hg19::chrX:45606421..45606530-
hsa-miR-222-3p	MIMAT0000279	Endothelial Cells - Lymphatic, donor1	hg19::chrX:45606421..45606530-
hsa-miR-222-3p	MIMAT0000279	Endothelial Cells - Lymphatic, donor2	hg19::chrX:45606421..45606530-
hsa-miR-222-3p	MIMAT0000279	Endothelial Cells - Lymphatic, donor3	hg19::chrX:45606421..45606530-
hsa-miR-222-3p	MIMAT0000279	Endothelial Cells - Microvascular, donor1	hg19::chrX:45606421..45606530-
hsa-miR-222-3p	MIMAT0000279	Endothelial Cells - Microvascular, donor3	hg19::chrX:45606421..45606530-
hsa-miR-222-3p	MIMAT0000279	Endothelial Cells - Thoracic, donor1	hg19::chrX:45606421..45606530-
hsa-miR-222-3p	MIMAT0000279	Endothelial Cells - Thoracic, donor2	hg19::chrX:45606421..45606530-
hsa-miR-222-3p	MIMAT0000279	Endothelial Cells - Umbilical vein, donor1	hg19::chrX:45606421..45606530-
hsa-miR-222-3p	MIMAT0000279	Endothelial Cells - Umbilical vein, donor2	hg19::chrX:45606421..45606530-
hsa-miR-222-3p	MIMAT0000279	Endothelial Cells - Umbilical vein, donor3	hg19::chrX:45606421..45606530-
hsa-miR-222-3p	MIMAT0000279	Endothelial Cells - Vein, donor1	hg19::chrX:45606421..45606530-
hsa-miR-222-3p	MIMAT0000279	Endothelial Cells - Vein, donor2	hg19::chrX:45606421..45606530-
hsa-miR-222-3p	MIMAT0000279	Endothelial Cells - Vein, donor3	hg19::chrX:45606421..45606530-
hsa-miR-222-3p	MIMAT0000279	Esophageal Epithelial Cells, donor1	hg19::chrX:45606421..45606530-
hsa-miR-222-3p	MIMAT0000279	Esophageal Epithelial Cells, donor2	hg19::chrX:45606421..45606530-
hsa-miR-222-3p	MIMAT0000279	Fibroblast - Aortic Adventitial, donor1	hg19::chrX:45606421..45606530-
hsa-miR-222-3p	MIMAT0000279	Fibroblast - Aortic Adventitial, donor2	hg19::chrX:45606421..45606530-
hsa-miR-222-3p	MIMAT0000279	Fibroblast - Aortic Adventitial, donor2 (nuclear fraction)	hg19::chrX:45606421..45606530-
hsa-miR-222-3p	MIMAT0000279	Fibroblast - Aortic Adventitial, donor3	hg19::chrX:45606421..45606530-
hsa-miR-222-3p	MIMAT0000279	Fibroblast - Aortic Adventitial, donor3 (nuclear fraction)	hg19::chrX:45606421..45606530-
hsa-miR-222-3p	MIMAT0000279	Fibroblast - Cardiac, donor1	hg19::chrX:45606421..45606530-
hsa-miR-222-3p	MIMAT0000279	Fibroblast - Cardiac, donor2	hg19::chrX:45606421..45606530-
hsa-miR-222-3p	MIMAT0000279	Fibroblast - Cardiac, donor3	hg19::chrX:45606421..45606530-
hsa-miR-222-3p	MIMAT0000279	Fibroblast - Choroid Plexus, donor1	hg19::chrX:45606421..45606530-
hsa-miR-222-3p	MIMAT0000279	Fibroblast - Conjunctival, donor1	hg19::chrX:45606421..45606530-
hsa-miR-222-3p	MIMAT0000279	Fibroblast - Dermal (cytosolic)	hg19::chrX:45606421..45606530-
hsa-miR-222-3p	MIMAT0000279	Fibroblast - Dermal (nuclear)	hg19::chrX:45606421..45606530-
hsa-miR-222-3p	MIMAT0000279	Fibroblast - Dermal, donor1	hg19::chrX:45606421..45606530-
hsa-miR-222-3p	MIMAT0000279	Fibroblast - Dermal, donor2	hg19::chrX:45606421..45606530-
hsa-miR-222-3p	MIMAT0000279	Fibroblast - Dermal, donor3	hg19::chrX:45606421..45606530-
hsa-miR-222-3p	MIMAT0000279	Fibroblast - Gingival, donor1	hg19::chrX:45606421..45606530-
hsa-miR-222-3p	MIMAT0000279	Fibroblast - Gingival, donor2	hg19::chrX:45606421..45606530-
hsa-miR-222-3p	MIMAT0000279	Fibroblast - Gingival, donor3	hg19::chrX:45606421..45606530-
hsa-miR-222-3p	MIMAT0000279	Fibroblast - Lung, donor1	hg19::chrX:45606421..45606530-
hsa-miR-222-3p	MIMAT0000279	Fibroblast - Lung, donor2	hg19::chrX:45606421..45606530-
hsa-miR-222-3p	MIMAT0000279	Fibroblast - Lung, donor3	hg19::chrX:45606421..45606530-
hsa-miR-222-3p	MIMAT0000279	Fibroblast - Lymphatic, donor1	hg19::chrX:45606421..45606530-
hsa-miR-222-3p	MIMAT0000279	Fibroblast - Lymphatic, donor2	hg19::chrX:45606421..45606530-
hsa-miR-222-3p	MIMAT0000279	Fibroblast - Lymphatic, donor3	hg19::chrX:45606421..45606530-
hsa-miR-222-3p	MIMAT0000279	Fibroblast - Mammary, donor1	hg19::chrX:45606421..45606530-
hsa-miR-222-3p	MIMAT0000279	Fibroblast - Mammary, donor2	hg19::chrX:45606421..45606530-
hsa-miR-222-3p	MIMAT0000279	Fibroblast - Mammary, donor3	hg19::chrX:45606421..45606530-
hsa-miR-222-3p	MIMAT0000279	Fibroblast - Periodontal Ligament, donor1	hg19::chrX:45606421..45606530-
hsa-miR-222-3p	MIMAT0000279	Fibroblast - Periodontal Ligament, donor2	hg19::chrX:45606421..45606530-
hsa-miR-222-3p	MIMAT0000279	Fibroblast - Periodontal Ligament, donor3	hg19::chrX:45606421..45606530-
hsa-miR-222-3p	MIMAT0000279	Fibroblast - Pulmonary Artery, donor1	hg19::chrX:45606421..45606530-
hsa-miR-222-3p	MIMAT0000279	Fibroblast - skin normal, donor2 (nuclear fraction)	hg19::chrX:45606421..45606530-
hsa-miR-222-3p	MIMAT0000279	Fibroblast - Villous Mesenchymal, donor1	hg19::chrX:45606421..45606530-
hsa-miR-222-3p	MIMAT0000279	Gingival epithelial cells, donor2 (GEA14)	hg19::chrX:45606421..45606530-
hsa-miR-222-3p	MIMAT0000279	Gingival epithelial cells, donor3 (GEA15)	hg19::chrX:45606421..45606530-
hsa-miR-222-3p	MIMAT0000279	H9 Embryonic Stem cells, biol_rep1 (H9ES-1)	hg19::chrX:45606421..45606530-
hsa-miR-222-3p	MIMAT0000279	Hair Follicle Dermal Papilla Cells, donor1	hg19::chrX:45606421..45606530-
hsa-miR-222-3p	MIMAT0000279	Hair Follicle Dermal Papilla Cells, donor2	hg19::chrX:45606421..45606530-
hsa-miR-222-3p	MIMAT0000279	Hair Follicle Dermal Papilla Cells, donor3	hg19::chrX:45606421..45606530-
hsa-miR-222-3p	MIMAT0000279	Hepatic Sinusoidal Endothelial Cells, donor1	hg19::chrX:45606421..45606530-
hsa-miR-222-3p	MIMAT0000279	Hepatic Sinusoidal Endothelial Cells, donor2	hg19::chrX:45606421..45606530-
hsa-miR-222-3p	MIMAT0000279	Hepatic Stellate Cells (lipocyte), donor1	hg19::chrX:45606421..45606530-
hsa-miR-222-3p	MIMAT0000279	Hepatic Stellate Cells (lipocyte), donor2	hg19::chrX:45606421..45606530-
hsa-miR-222-3p	MIMAT0000279	Hepatocyte, donor1	hg19::chrX:45606421..45606530-
hsa-miR-222-3p	MIMAT0000279	Hepatocyte, donor2	hg19::chrX:45606421..45606530-
hsa-miR-222-3p	MIMAT0000279	Hepatocyte, donor3	hg19::chrX:45606421..45606530-
hsa-miR-222-3p	MIMAT0000279	Intestinal epithelial cells (polarized), donor1	hg19::chrX:45606421..45606530-
hsa-miR-222-3p	MIMAT0000279	iPS derived from CD19+ B Lymphocytes (cytosolic)	hg19::chrX:45606421..45606530-
hsa-miR-222-3p	MIMAT0000279	iPS derived from CD19+ B Lymphocytes (nuclear)	hg19::chrX:45606421..45606530-
hsa-miR-222-3p	MIMAT0000279	iPS derived from CD3+ T Lymphocytes (cytosolic)	hg19::chrX:45606421..45606530-
hsa-miR-222-3p	MIMAT0000279	iPS derived from CD3+ T Lymphocytes (nuclear)	hg19::chrX:45606421..45606530-
hsa-miR-222-3p	MIMAT0000279	iPS derived from Dermal Fibroblast (cytosolic)	hg19::chrX:45606421..45606530-
hsa-miR-222-3p	MIMAT0000279	iPS derived from Dermal Fibroblast (nuclear)	hg19::chrX:45606421..45606530-
hsa-miR-222-3p	MIMAT0000279	Keratinocyte - epidermal, donor1	hg19::chrX:45606421..45606530-
hsa-miR-222-3p	MIMAT0000279	Keratinocyte - epidermal, donor2	hg19::chrX:45606421..45606530-
hsa-miR-222-3p	MIMAT0000279	Keratinocyte - epidermal, donor3	hg19::chrX:45606421..45606530-
hsa-miR-222-3p	MIMAT0000279	Keratinocyte - oral, donor1	hg19::chrX:45606421..45606530-
hsa-miR-222-3p	MIMAT0000279	Keratocytes, donor1	hg19::chrX:45606421..45606530-
hsa-miR-222-3p	MIMAT0000279	Keratocytes, donor2	hg19::chrX:45606421..45606530-
hsa-miR-222-3p	MIMAT0000279	Lymphatic Endothelial cells response to VEGFC, 00hr00min, biol_rep1 (MM XIX - 1)	hg19::chrX:45606421..45606530-
hsa-miR-222-3p	MIMAT0000279	Lymphatic Endothelial cells response to VEGFC, 00hr00min, biol_rep2 (MM XIV - 1)	hg19::chrX:45606421..45606530-
hsa-miR-222-3p	MIMAT0000279	Lymphatic Endothelial cells response to VEGFC, 00hr00min, biol_rep3 (MM XXII - 1)	hg19::chrX:45606421..45606530-
hsa-miR-222-3p	MIMAT0000279	Lymphatic Endothelial cells response to VEGFC, 01hr00min, biol_rep1 (MM XIX - 5)	hg19::chrX:45606421..45606530-
hsa-miR-222-3p	MIMAT0000279	Lymphatic Endothelial cells response to VEGFC, 01hr00min, biol_rep2 (MM XIV - 5)	hg19::chrX:45606421..45606530-
hsa-miR-222-3p	MIMAT0000279	Lymphatic Endothelial cells response to VEGFC, 01hr00min, biol_rep3 (MM XXII - 5)	hg19::chrX:45606421..45606530-
hsa-miR-222-3p	MIMAT0000279	Lymphatic Endothelial cells response to VEGFC, 02hr00min, biol_rep1 (MM XIX - 8)	hg19::chrX:45606421..45606530-
hsa-miR-222-3p	MIMAT0000279	Lymphatic Endothelial cells response to VEGFC, 02hr00min, biol_rep2 (MM XIV - 8)	hg19::chrX:45606421..45606530-
hsa-miR-222-3p	MIMAT0000279	Lymphatic Endothelial cells response to VEGFC, 02hr00min, biol_rep3 (MM XXII - 8)	hg19::chrX:45606421..45606530-
hsa-miR-222-3p	MIMAT0000279	Lymphatic Endothelial cells response to VEGFC, 04hr00min, biol_rep1 (MM XIX - 12)	hg19::chrX:45606421..45606530-
hsa-miR-222-3p	MIMAT0000279	Lymphatic Endothelial cells response to VEGFC, 04hr00min, biol_rep2 (MM XIV - 12)	hg19::chrX:45606421..45606530-
hsa-miR-222-3p	MIMAT0000279	Lymphatic Endothelial cells response to VEGFC, 04hr00min, biol_rep3 (MM XXII - 12)	hg19::chrX:45606421..45606530-
hsa-miR-222-3p	MIMAT0000279	Lymphatic Endothelial cells response to VEGFC, 08hr00min, biol_rep1 (MM XIX - 16)	hg19::chrX:45606421..45606530-
hsa-miR-222-3p	MIMAT0000279	Lymphatic Endothelial cells response to VEGFC, 08hr00min, biol_rep2 (MM XIV - 16)	hg19::chrX:45606421..45606530-
hsa-miR-222-3p	MIMAT0000279	Lymphatic Endothelial cells response to VEGFC, 08hr00min, biol_rep3 (MM XXII - 16)	hg19::chrX:45606421..45606530-
hsa-miR-222-3p	MIMAT0000279	Macrophage - monocyte derived, donor1	hg19::chrX:45606421..45606530-
hsa-miR-222-3p	MIMAT0000279	Macrophage - monocyte derived, donor2	hg19::chrX:45606421..45606530-
hsa-miR-222-3p	MIMAT0000279	Macrophage - monocyte derived, donor3	hg19::chrX:45606421..45606530-
hsa-miR-222-3p	MIMAT0000279	Mammary Epithelial Cell, donor1	hg19::chrX:45606421..45606530-
hsa-miR-222-3p	MIMAT0000279	Mammary Epithelial Cell, donor2	hg19::chrX:45606421..45606530-
hsa-miR-222-3p	MIMAT0000279	Mammary Epithelial Cell, donor3	hg19::chrX:45606421..45606530-
hsa-miR-222-3p	MIMAT0000279	Mast cell - stimulated, donor1	hg19::chrX:45606421..45606530-
hsa-miR-222-3p	MIMAT0000279	Mast cell, donor2	hg19::chrX:45606421..45606530-
hsa-miR-222-3p	MIMAT0000279	Mast cell, donor3	hg19::chrX:45606421..45606530-
hsa-miR-222-3p	MIMAT0000279	Mast cell, donor4	hg19::chrX:45606421..45606530-
hsa-miR-222-3p	MIMAT0000279	MCF7 breast cancer cell line response to EGF1, 00hr00min, biol_rep1	hg19::chrX:45606421..45606530-
hsa-miR-222-3p	MIMAT0000279	MCF7 breast cancer cell line response to EGF1, 00hr00min, biol_rep2	hg19::chrX:45606421..45606530-
hsa-miR-222-3p	MIMAT0000279	MCF7 breast cancer cell line response to EGF1, 00hr00min, biol_rep3	hg19::chrX:45606421..45606530-
hsa-miR-222-3p	MIMAT0000279	MCF7 breast cancer cell line response to HRG, 00hr15min, biol_rep1	hg19::chrX:45606421..45606530-
hsa-miR-222-3p	MIMAT0000279	MCF7 breast cancer cell line response to HRG, 00hr15min, biol_rep2	hg19::chrX:45606421..45606530-
hsa-miR-222-3p	MIMAT0000279	MCF7 breast cancer cell line response to HRG, 00hr15min, biol_rep3	hg19::chrX:45606421..45606530-
hsa-miR-222-3p	MIMAT0000279	MCF7 breast cancer cell line response to HRG, 00hr30min, biol_rep1	hg19::chrX:45606421..45606530-
hsa-miR-222-3p	MIMAT0000279	MCF7 breast cancer cell line response to HRG, 00hr30min, biol_rep2	hg19::chrX:45606421..45606530-
hsa-miR-222-3p	MIMAT0000279	MCF7 breast cancer cell line response to HRG, 00hr30min, biol_rep3	hg19::chrX:45606421..45606530-
hsa-miR-222-3p	MIMAT0000279	MCF7 breast cancer cell line response to HRG, 00hr45min, biol_rep1	hg19::chrX:45606421..45606530-
hsa-miR-222-3p	MIMAT0000279	MCF7 breast cancer cell line response to HRG, 00hr45min, biol_rep2	hg19::chrX:45606421..45606530-
hsa-miR-222-3p	MIMAT0000279	MCF7 breast cancer cell line response to HRG, 00hr45min, biol_rep3	hg19::chrX:45606421..45606530-
hsa-miR-222-3p	MIMAT0000279	MCF7 breast cancer cell line response to HRG, 01hr00min, biol_rep1	hg19::chrX:45606421..45606530-
hsa-miR-222-3p	MIMAT0000279	MCF7 breast cancer cell line response to HRG, 01hr00min, biol_rep2	hg19::chrX:45606421..45606530-
hsa-miR-222-3p	MIMAT0000279	MCF7 breast cancer cell line response to HRG, 01hr00min, biol_rep3	hg19::chrX:45606421..45606530-
hsa-miR-222-3p	MIMAT0000279	MCF7 breast cancer cell line response to HRG, 01hr20min, biol_rep1	hg19::chrX:45606421..45606530-
hsa-miR-222-3p	MIMAT0000279	MCF7 breast cancer cell line response to HRG, 01hr20min, biol_rep2	hg19::chrX:45606421..45606530-
hsa-miR-222-3p	MIMAT0000279	MCF7 breast cancer cell line response to HRG, 01hr20min, biol_rep3	hg19::chrX:45606421..45606530-
hsa-miR-222-3p	MIMAT0000279	MCF7 breast cancer cell line response to HRG, 01hr40min, biol_rep1	hg19::chrX:45606421..45606530-
hsa-miR-222-3p	MIMAT0000279	MCF7 breast cancer cell line response to HRG, 01hr40min, biol_rep2	hg19::chrX:45606421..45606530-
hsa-miR-222-3p	MIMAT0000279	MCF7 breast cancer cell line response to HRG, 01hr40min, biol_rep3	hg19::chrX:45606421..45606530-
hsa-miR-222-3p	MIMAT0000279	MCF7 breast cancer cell line response to HRG, 04hr, biol_rep1	hg19::chrX:45606421..45606530-
hsa-miR-222-3p	MIMAT0000279	MCF7 breast cancer cell line response to HRG, 04hr, biol_rep2	hg19::chrX:45606421..45606530-
hsa-miR-222-3p	MIMAT0000279	MCF7 breast cancer cell line response to HRG, 04hr, biol_rep3	hg19::chrX:45606421..45606530-
hsa-miR-222-3p	MIMAT0000279	MCF7 breast cancer cell line response to HRG, 08hr, biol_rep2	hg19::chrX:45606421..45606530-
hsa-miR-222-3p	MIMAT0000279	MCF7 breast cancer cell line response to HRG, 08hr, biol_rep3	hg19::chrX:45606421..45606530-
hsa-miR-222-3p	MIMAT0000279	Melanocyte - light, donor1	hg19::chrX:45606421..45606530-
hsa-miR-222-3p	MIMAT0000279	Melanocyte - light, donor2	hg19::chrX:45606421..45606530-
hsa-miR-222-3p	MIMAT0000279	Melanocyte - light, donor3	hg19::chrX:45606421..45606530-
hsa-miR-222-3p	MIMAT0000279	Meningeal Cells, donor1	hg19::chrX:45606421..45606530-
hsa-miR-222-3p	MIMAT0000279	Meningeal Cells, donor2	hg19::chrX:45606421..45606530-
hsa-miR-222-3p	MIMAT0000279	Mesenchymal Stem Cells - adipose, donor0	hg19::chrX:45606421..45606530-
hsa-miR-222-3p	MIMAT0000279	Mesenchymal Stem Cells - adipose, donor1	hg19::chrX:45606421..45606530-
hsa-miR-222-3p	MIMAT0000279	Mesenchymal Stem Cells - adipose, donor2	hg19::chrX:45606421..45606530-
hsa-miR-222-3p	MIMAT0000279	Mesenchymal Stem Cells - amniotic membrane, donor1	hg19::chrX:45606421..45606530-
hsa-miR-222-3p	MIMAT0000279	Mesenchymal Stem Cells - amniotic membrane, donor2	hg19::chrX:45606421..45606530-
hsa-miR-222-3p	MIMAT0000279	Mesenchymal Stem Cells - bone marrow, donor1	hg19::chrX:45606421..45606530-
hsa-miR-222-3p	MIMAT0000279	Mesenchymal Stem Cells - bone marrow, donor3	hg19::chrX:45606421..45606530-
hsa-miR-222-3p	MIMAT0000279	Mesenchymal Stem Cells - bone marrow, donor4	hg19::chrX:45606421..45606530-
hsa-miR-222-3p	MIMAT0000279	Mesenchymal Stem Cells - hepatic, donor0	hg19::chrX:45606421..45606530-
hsa-miR-222-3p	MIMAT0000279	Mesenchymal Stem Cells - hepatic, donor1	hg19::chrX:45606421..45606530-
hsa-miR-222-3p	MIMAT0000279	Mesenchymal Stem Cells - umbilical, donor0	hg19::chrX:45606421..45606530-
hsa-miR-222-3p	MIMAT0000279	Mesenchymal Stem Cells - umbilical, donor1	hg19::chrX:45606421..45606530-
hsa-miR-222-3p	MIMAT0000279	Mesenchymal Stem Cells - umbilical, donor2	hg19::chrX:45606421..45606530-
hsa-miR-222-3p	MIMAT0000279	Mesenchymal Stem Cells - umbilical, donor3	hg19::chrX:45606421..45606530-
hsa-miR-222-3p	MIMAT0000279	Mesenchymal Stem Cells - Vertebral, donor1	hg19::chrX:45606421..45606530-
hsa-miR-222-3p	MIMAT0000279	Mesenchymal Stem Cells - Wharton's Jelly, donor1	hg19::chrX:45606421..45606530-
hsa-miR-222-3p	MIMAT0000279	mesenchymal stem cells (adipose derived), adipogenic induction, 00hr00min, biol_rep1	hg19::chrX:45606421..45606530-
hsa-miR-222-3p	MIMAT0000279	mesenchymal stem cells (adipose derived), adipogenic induction, 00hr00min, biol_rep2	hg19::chrX:45606421..45606530-
hsa-miR-222-3p	MIMAT0000279	mesenchymal stem cells (adipose derived), adipogenic induction, 00hr00min, biol_rep3	hg19::chrX:45606421..45606530-
hsa-miR-222-3p	MIMAT0000279	mesenchymal stem cells (adipose derived), adipogenic induction, 02hr00min, biol_rep1	hg19::chrX:45606421..45606530-
hsa-miR-222-3p	MIMAT0000279	mesenchymal stem cells (adipose derived), adipogenic induction, 02hr00min, biol_rep2	hg19::chrX:45606421..45606530-
hsa-miR-222-3p	MIMAT0000279	mesenchymal stem cells (adipose derived), adipogenic induction, 02hr00min, biol_rep3	hg19::chrX:45606421..45606530-
hsa-miR-222-3p	MIMAT0000279	mesenchymal stem cells (adipose derived), adipogenic induction, 12hr00min, biol_rep1	hg19::chrX:45606421..45606530-
hsa-miR-222-3p	MIMAT0000279	mesenchymal stem cells (adipose derived), adipogenic induction, 12hr00min, biol_rep2	hg19::chrX:45606421..45606530-
hsa-miR-222-3p	MIMAT0000279	mesenchymal stem cells (adipose derived), adipogenic induction, 12hr00min, biol_rep3	hg19::chrX:45606421..45606530-
hsa-miR-222-3p	MIMAT0000279	mesenchymal stem cells (adipose derived), adipogenic induction, day02, biol_rep1	hg19::chrX:45606421..45606530-
hsa-miR-222-3p	MIMAT0000279	mesenchymal stem cells (adipose derived), adipogenic induction, day02, biol_rep2	hg19::chrX:45606421..45606530-
hsa-miR-222-3p	MIMAT0000279	mesenchymal stem cells (adipose derived), adipogenic induction, day02, biol_rep3	hg19::chrX:45606421..45606530-
hsa-miR-222-3p	MIMAT0000279	mesenchymal stem cells (adipose derived), adipogenic induction, day04, biol_rep1	hg19::chrX:45606421..45606530-
hsa-miR-222-3p	MIMAT0000279	mesenchymal stem cells (adipose derived), adipogenic induction, day04, biol_rep2	hg19::chrX:45606421..45606530-
hsa-miR-222-3p	MIMAT0000279	mesenchymal stem cells (adipose derived), adipogenic induction, day04, biol_rep3	hg19::chrX:45606421..45606530-
hsa-miR-222-3p	MIMAT0000279	mesenchymal stem cells (adipose derived), adipogenic induction, day08, biol_rep1	hg19::chrX:45606421..45606530-
hsa-miR-222-3p	MIMAT0000279	mesenchymal stem cells (adipose derived), adipogenic induction, day08, biol_rep2	hg19::chrX:45606421..45606530-
hsa-miR-222-3p	MIMAT0000279	mesenchymal stem cells (adipose derived), adipogenic induction, day08, biol_rep3	hg19::chrX:45606421..45606530-
hsa-miR-222-3p	MIMAT0000279	mesenchymal stem cells (adipose derived), adipogenic induction, day12, biol_rep1	hg19::chrX:45606421..45606530-
hsa-miR-222-3p	MIMAT0000279	mesenchymal stem cells (adipose derived), adipogenic induction, day12, biol_rep2	hg19::chrX:45606421..45606530-
hsa-miR-222-3p	MIMAT0000279	mesenchymal stem cells (adipose derived), adipogenic induction, day12, biol_rep3	hg19::chrX:45606421..45606530-
hsa-miR-222-3p	MIMAT0000279	Mesothelial Cells, donor1	hg19::chrX:45606421..45606530-
hsa-miR-222-3p	MIMAT0000279	Mesothelial Cells, donor3	hg19::chrX:45606421..45606530-
hsa-miR-222-3p	MIMAT0000279	Multipotent Cord Blood Unrestricted Somatic Stem Cells, donor1	hg19::chrX:45606421..45606530-
hsa-miR-222-3p	MIMAT0000279	Multipotent Cord Blood Unrestricted Somatic Stem Cells, donor2	hg19::chrX:45606421..45606530-
hsa-miR-222-3p	MIMAT0000279	Myoblast, donor1	hg19::chrX:45606421..45606530-
hsa-miR-222-3p	MIMAT0000279	Myoblast, donor2	hg19::chrX:45606421..45606530-
hsa-miR-222-3p	MIMAT0000279	Myoblast, donor3	hg19::chrX:45606421..45606530-
hsa-miR-222-3p	MIMAT0000279	Natural Killer Cells, donor1	hg19::chrX:45606421..45606530-
hsa-miR-222-3p	MIMAT0000279	Natural Killer Cells, donor2	hg19::chrX:45606421..45606530-
hsa-miR-222-3p	MIMAT0000279	Natural Killer Cells, donor3	hg19::chrX:45606421..45606530-
hsa-miR-222-3p	MIMAT0000279	Neural stem cells, donor2	hg19::chrX:45606421..45606530-
hsa-miR-222-3p	MIMAT0000279	Neural stem cells, donor3	hg19::chrX:45606421..45606530-
hsa-miR-222-3p	MIMAT0000279	Neutrophils, donor1	hg19::chrX:45606421..45606530-
hsa-miR-222-3p	MIMAT0000279	Neutrophils, donor2	hg19::chrX:45606421..45606530-
hsa-miR-222-3p	MIMAT0000279	Neutrophils, donor3	hg19::chrX:45606421..45606530-
hsa-miR-222-3p	MIMAT0000279	Nucleus Pulposus Cell, donor1	hg19::chrX:45606421..45606530-
hsa-miR-222-3p	MIMAT0000279	Nucleus Pulposus Cell, donor3	hg19::chrX:45606421..45606530-
hsa-miR-222-3p	MIMAT0000279	Osteoblast - differentiated, donor1	hg19::chrX:45606421..45606530-
hsa-miR-222-3p	MIMAT0000279	Osteoblast - differentiated, donor2	hg19::chrX:45606421..45606530-
hsa-miR-222-3p	MIMAT0000279	Osteoblast - differentiated, donor3	hg19::chrX:45606421..45606530-
hsa-miR-222-3p	MIMAT0000279	Osteoblast, donor1	hg19::chrX:45606421..45606530-
hsa-miR-222-3p	MIMAT0000279	Osteoblast, donor2	hg19::chrX:45606421..45606530-
hsa-miR-222-3p	MIMAT0000279	Osteoblast, donor3	hg19::chrX:45606421..45606530-
hsa-miR-222-3p	MIMAT0000279	Pancreatic stromal cells, donor1	hg19::chrX:45606421..45606530-
hsa-miR-222-3p	MIMAT0000279	Pericytes, donor1	hg19::chrX:45606421..45606530-
hsa-miR-222-3p	MIMAT0000279	Pericytes, donor3	hg19::chrX:45606421..45606530-
hsa-miR-222-3p	MIMAT0000279	Peripheral Blood Mononuclear Cells, donor1	hg19::chrX:45606421..45606530-
hsa-miR-222-3p	MIMAT0000279	Peripheral Blood Mononuclear Cells, donor2	hg19::chrX:45606421..45606530-
hsa-miR-222-3p	MIMAT0000279	Peripheral Blood Mononuclear Cells, donor3	hg19::chrX:45606421..45606530-
hsa-miR-222-3p	MIMAT0000279	pineal gland, adult, donor10252	hg19::chrX:45606421..45606530-
hsa-miR-222-3p	MIMAT0000279	pituitary gland, adult, donor10252	hg19::chrX:45606421..45606530-
hsa-miR-222-3p	MIMAT0000279	Placental Epithelial Cells, donor1	hg19::chrX:45606421..45606530-
hsa-miR-222-3p	MIMAT0000279	Placental Epithelial Cells, donor2	hg19::chrX:45606421..45606530-
hsa-miR-222-3p	MIMAT0000279	Placental Epithelial Cells, donor3	hg19::chrX:45606421..45606530-
hsa-miR-222-3p	MIMAT0000279	Preadipocyte - breast, donor2	hg19::chrX:45606421..45606530-
hsa-miR-222-3p	MIMAT0000279	Preadipocyte - breast, donor2 (nuclear fraction)	hg19::chrX:45606421..45606530-
hsa-miR-222-3p	MIMAT0000279	Preadipocyte - omental, donor1	hg19::chrX:45606421..45606530-
hsa-miR-222-3p	MIMAT0000279	Preadipocyte - omental, donor2	hg19::chrX:45606421..45606530-
hsa-miR-222-3p	MIMAT0000279	Preadipocyte - omental, donor3	hg19::chrX:45606421..45606530-
hsa-miR-222-3p	MIMAT0000279	Preadipocyte - perirenal, donor1	hg19::chrX:45606421..45606530-
hsa-miR-222-3p	MIMAT0000279	Preadipocyte - subcutaneous, donor1	hg19::chrX:45606421..45606530-
hsa-miR-222-3p	MIMAT0000279	Preadipocyte - subcutaneous, donor2	hg19::chrX:45606421..45606530-
hsa-miR-222-3p	MIMAT0000279	Preadipocyte - subcutaneous, donor3	hg19::chrX:45606421..45606530-
hsa-miR-222-3p	MIMAT0000279	Preadipocyte - visceral, donor1	hg19::chrX:45606421..45606530-
hsa-miR-222-3p	MIMAT0000279	Preadipocyte - visceral, donor2	hg19::chrX:45606421..45606530-
hsa-miR-222-3p	MIMAT0000279	Preadipocyte - visceral, donor3	hg19::chrX:45606421..45606530-
hsa-miR-222-3p	MIMAT0000279	Prostate Epithelial Cells (polarized), donor1	hg19::chrX:45606421..45606530-
hsa-miR-222-3p	MIMAT0000279	Prostate Epithelial Cells, donor2	hg19::chrX:45606421..45606530-
hsa-miR-222-3p	MIMAT0000279	Prostate Epithelial Cells, donor3	hg19::chrX:45606421..45606530-
hsa-miR-222-3p	MIMAT0000279	Prostate Stromal Cells, donor1	hg19::chrX:45606421..45606530-
hsa-miR-222-3p	MIMAT0000279	Prostate Stromal Cells, donor2	hg19::chrX:45606421..45606530-
hsa-miR-222-3p	MIMAT0000279	Prostate Stromal Cells, donor3	hg19::chrX:45606421..45606530-
hsa-miR-222-3p	MIMAT0000279	Renal Cortical Epithelial Cells, donor1	hg19::chrX:45606421..45606530-
hsa-miR-222-3p	MIMAT0000279	Renal Epithelial Cells, donor1	hg19::chrX:45606421..45606530-
hsa-miR-222-3p	MIMAT0000279	Renal Epithelial Cells, donor2	hg19::chrX:45606421..45606530-
hsa-miR-222-3p	MIMAT0000279	Renal Glomerular Endothelial Cells, donor1	hg19::chrX:45606421..45606530-
hsa-miR-222-3p	MIMAT0000279	Renal Glomerular Endothelial Cells, donor2	hg19::chrX:45606421..45606530-
hsa-miR-222-3p	MIMAT0000279	Renal Mesangial Cells, donor1	hg19::chrX:45606421..45606530-
hsa-miR-222-3p	MIMAT0000279	Renal Mesangial Cells, donor2	hg19::chrX:45606421..45606530-
hsa-miR-222-3p	MIMAT0000279	Renal Proximal Tubular Epithelial Cell, donor1	hg19::chrX:45606421..45606530-
hsa-miR-222-3p	MIMAT0000279	Renal Proximal Tubular Epithelial Cell, donor2	hg19::chrX:45606421..45606530-
hsa-miR-222-3p	MIMAT0000279	Renal Proximal Tubular Epithelial Cell, donor3	hg19::chrX:45606421..45606530-
hsa-miR-222-3p	MIMAT0000279	Retinal Pigment Epithelial Cells, donor0	hg19::chrX:45606421..45606530-
hsa-miR-222-3p	MIMAT0000279	Retinal Pigment Epithelial Cells, donor1	hg19::chrX:45606421..45606530-
hsa-miR-222-3p	MIMAT0000279	Retinal Pigment Epithelial Cells, donor2	hg19::chrX:45606421..45606530-
hsa-miR-222-3p	MIMAT0000279	Saos-2 osteosarcoma treated with ascorbic acid and BGP to induce calcification, 00hr00min, biol_rep1 (A1 T0)	hg19::chrX:45606421..45606530-
hsa-miR-222-3p	MIMAT0000279	Saos-2 osteosarcoma treated with ascorbic acid and BGP to induce calcification, 00hr00min, biol_rep2 (A2 T0)	hg19::chrX:45606421..45606530-
hsa-miR-222-3p	MIMAT0000279	Saos-2 osteosarcoma treated with ascorbic acid and BGP to induce calcification, 00hr00min, biol_rep3 (A3 T0)	hg19::chrX:45606421..45606530-
hsa-miR-222-3p	MIMAT0000279	Saos-2 osteosarcoma treated with ascorbic acid and BGP to induce calcification, 01hr00min, biol_rep1 (A1 T4)	hg19::chrX:45606421..45606530-
hsa-miR-222-3p	MIMAT0000279	Saos-2 osteosarcoma treated with ascorbic acid and BGP to induce calcification, 01hr00min, biol_rep2 (A2 T4)	hg19::chrX:45606421..45606530-
hsa-miR-222-3p	MIMAT0000279	Saos-2 osteosarcoma treated with ascorbic acid and BGP to induce calcification, 01hr00min, biol_rep3 (A3 T4)	hg19::chrX:45606421..45606530-
hsa-miR-222-3p	MIMAT0000279	Saos-2 osteosarcoma treated with ascorbic acid and BGP to induce calcification, 24hr, biol_rep1 (A1 T12)	hg19::chrX:45606421..45606530-
hsa-miR-222-3p	MIMAT0000279	Saos-2 osteosarcoma treated with ascorbic acid and BGP to induce calcification, 24hr, biol_rep2 (A2 T12)	hg19::chrX:45606421..45606530-
hsa-miR-222-3p	MIMAT0000279	Saos-2 osteosarcoma treated with ascorbic acid and BGP to induce calcification, 24hr, biol_rep3 (A3 T12)	hg19::chrX:45606421..45606530-
hsa-miR-222-3p	MIMAT0000279	Saos-2 osteosarcoma treated with ascorbic acid and BGP to induce calcification, day04, biol_rep1 (A1 T13)	hg19::chrX:45606421..45606530-
hsa-miR-222-3p	MIMAT0000279	Saos-2 osteosarcoma treated with ascorbic acid and BGP to induce calcification, day04, biol_rep2 (A2 T13)	hg19::chrX:45606421..45606530-
hsa-miR-222-3p	MIMAT0000279	Saos-2 osteosarcoma treated with ascorbic acid and BGP to induce calcification, day04, biol_rep3 (A3 T13)	hg19::chrX:45606421..45606530-
hsa-miR-222-3p	MIMAT0000279	Saos-2 osteosarcoma treated with ascorbic acid and BGP to induce calcification, day28, biol_rep1 (A1 T17)	hg19::chrX:45606421..45606530-
hsa-miR-222-3p	MIMAT0000279	Saos-2 osteosarcoma treated with ascorbic acid and BGP to induce calcification, day28, biol_rep2 (A2 T17)	hg19::chrX:45606421..45606530-
hsa-miR-222-3p	MIMAT0000279	Saos-2 osteosarcoma treated with ascorbic acid and BGP to induce calcification, day28, biol_rep3 (A3 T17)	hg19::chrX:45606421..45606530-
hsa-miR-222-3p	MIMAT0000279	Schwann Cells, donor1	hg19::chrX:45606421..45606530-
hsa-miR-222-3p	MIMAT0000279	Sebocyte, donor1	hg19::chrX:45606421..45606530-
hsa-miR-222-3p	MIMAT0000279	Sebocyte, donor2	hg19::chrX:45606421..45606530-
hsa-miR-222-3p	MIMAT0000279	Sebocyte, donor3	hg19::chrX:45606421..45606530-
hsa-miR-222-3p	MIMAT0000279	Sertoli Cells, donor1	hg19::chrX:45606421..45606530-
hsa-miR-222-3p	MIMAT0000279	Sertoli Cells, donor2	hg19::chrX:45606421..45606530-
hsa-miR-222-3p	MIMAT0000279	Skeletal muscle cells differentiated into Myotubes - multinucleated, donor1	hg19::chrX:45606421..45606530-
hsa-miR-222-3p	MIMAT0000279	Skeletal muscle cells differentiated into Myotubes - multinucleated, donor2	hg19::chrX:45606421..45606530-
hsa-miR-222-3p	MIMAT0000279	Skeletal Muscle Cells, donor1	hg19::chrX:45606421..45606530-
hsa-miR-222-3p	MIMAT0000279	Skeletal Muscle Cells, donor2	hg19::chrX:45606421..45606530-
hsa-miR-222-3p	MIMAT0000279	Skeletal Muscle Cells, donor3	hg19::chrX:45606421..45606530-
hsa-miR-222-3p	MIMAT0000279	Skeletal Muscle Satellite Cells, donor1	hg19::chrX:45606421..45606530-
hsa-miR-222-3p	MIMAT0000279	Skeletal Muscle Satellite Cells, donor2	hg19::chrX:45606421..45606530-
hsa-miR-222-3p	MIMAT0000279	Skeletal Muscle Satellite Cells, donor3	hg19::chrX:45606421..45606530-
hsa-miR-222-3p	MIMAT0000279	Small Airway Epithelial Cells, donor1	hg19::chrX:45606421..45606530-
hsa-miR-222-3p	MIMAT0000279	Small Airway Epithelial Cells, donor2	hg19::chrX:45606421..45606530-
hsa-miR-222-3p	MIMAT0000279	Small Airway Epithelial Cells, donor3	hg19::chrX:45606421..45606530-
hsa-miR-222-3p	MIMAT0000279	Small Airway Epithelial Cells, donor3 (nuclear fraction)	hg19::chrX:45606421..45606530-
hsa-miR-222-3p	MIMAT0000279	Smooth Muscle Cells - Aortic, donor0	hg19::chrX:45606421..45606530-
hsa-miR-222-3p	MIMAT0000279	Smooth Muscle Cells - Aortic, donor0 (nuclear fraction)	hg19::chrX:45606421..45606530-
hsa-miR-222-3p	MIMAT0000279	Smooth Muscle Cells - Aortic, donor1	hg19::chrX:45606421..45606530-
hsa-miR-222-3p	MIMAT0000279	Smooth Muscle Cells - Aortic, donor2	hg19::chrX:45606421..45606530-
hsa-miR-222-3p	MIMAT0000279	Smooth Muscle Cells - Brachiocephalic, donor1	hg19::chrX:45606421..45606530-
hsa-miR-222-3p	MIMAT0000279	Smooth Muscle Cells - Brachiocephalic, donor2	hg19::chrX:45606421..45606530-
hsa-miR-222-3p	MIMAT0000279	Smooth Muscle Cells - Brachiocephalic, donor3	hg19::chrX:45606421..45606530-
hsa-miR-222-3p	MIMAT0000279	Smooth Muscle Cells - Brain Vascular, donor1	hg19::chrX:45606421..45606530-
hsa-miR-222-3p	MIMAT0000279	Smooth Muscle Cells - Brain Vascular, donor2	hg19::chrX:45606421..45606530-
hsa-miR-222-3p	MIMAT0000279	Smooth Muscle Cells - Brain Vascular, donor3	hg19::chrX:45606421..45606530-
hsa-miR-222-3p	MIMAT0000279	Smooth Muscle Cells - Bronchial, donor1	hg19::chrX:45606421..45606530-
hsa-miR-222-3p	MIMAT0000279	Smooth Muscle Cells - Carotid, donor1	hg19::chrX:45606421..45606530-
hsa-miR-222-3p	MIMAT0000279	Smooth Muscle Cells - Carotid, donor2	hg19::chrX:45606421..45606530-
hsa-miR-222-3p	MIMAT0000279	Smooth Muscle Cells - Colonic, donor1	hg19::chrX:45606421..45606530-
hsa-miR-222-3p	MIMAT0000279	Smooth Muscle Cells - Colonic, donor2	hg19::chrX:45606421..45606530-
hsa-miR-222-3p	MIMAT0000279	Smooth Muscle Cells - Colonic, donor3	hg19::chrX:45606421..45606530-
hsa-miR-222-3p	MIMAT0000279	Smooth Muscle Cells - Coronary Artery, donor1	hg19::chrX:45606421..45606530-
hsa-miR-222-3p	MIMAT0000279	Smooth Muscle Cells - Coronary Artery, donor2	hg19::chrX:45606421..45606530-
hsa-miR-222-3p	MIMAT0000279	Smooth Muscle Cells - Coronary Artery, donor3	hg19::chrX:45606421..45606530-
hsa-miR-222-3p	MIMAT0000279	Smooth Muscle Cells - Esophageal, donor1	hg19::chrX:45606421..45606530-
hsa-miR-222-3p	MIMAT0000279	Smooth Muscle Cells - Internal Thoracic Artery, donor1	hg19::chrX:45606421..45606530-
hsa-miR-222-3p	MIMAT0000279	Smooth Muscle Cells - Internal Thoracic Artery, donor2	hg19::chrX:45606421..45606530-
hsa-miR-222-3p	MIMAT0000279	Smooth Muscle Cells - Internal Thoracic Artery, donor3	hg19::chrX:45606421..45606530-
hsa-miR-222-3p	MIMAT0000279	Smooth Muscle Cells - Prostate, donor1	hg19::chrX:45606421..45606530-
hsa-miR-222-3p	MIMAT0000279	Smooth Muscle Cells - Prostate, donor2	hg19::chrX:45606421..45606530-
hsa-miR-222-3p	MIMAT0000279	Smooth Muscle Cells - Prostate, donor3	hg19::chrX:45606421..45606530-
hsa-miR-222-3p	MIMAT0000279	Smooth Muscle Cells - Pulmonary Artery, donor1	hg19::chrX:45606421..45606530-
hsa-miR-222-3p	MIMAT0000279	Smooth Muscle Cells - Pulmonary Artery, donor2	hg19::chrX:45606421..45606530-
hsa-miR-222-3p	MIMAT0000279	Smooth Muscle Cells - Pulmonary Artery, donor3	hg19::chrX:45606421..45606530-
hsa-miR-222-3p	MIMAT0000279	Smooth Muscle Cells - Subclavian Artery, donor1	hg19::chrX:45606421..45606530-
hsa-miR-222-3p	MIMAT0000279	Smooth Muscle Cells - Subclavian Artery, donor2	hg19::chrX:45606421..45606530-
hsa-miR-222-3p	MIMAT0000279	Smooth Muscle Cells - Subclavian Artery, donor3	hg19::chrX:45606421..45606530-
hsa-miR-222-3p	MIMAT0000279	Smooth Muscle Cells - Tracheal, donor1	hg19::chrX:45606421..45606530-
hsa-miR-222-3p	MIMAT0000279	Smooth Muscle Cells - Umbilical Artery, donor0	hg19::chrX:45606421..45606530-
hsa-miR-222-3p	MIMAT0000279	Smooth Muscle Cells - Umbilical Artery, donor1	hg19::chrX:45606421..45606530-
hsa-miR-222-3p	MIMAT0000279	Smooth Muscle Cells - Umbilical Artery, donor2	hg19::chrX:45606421..45606530-
hsa-miR-222-3p	MIMAT0000279	Smooth Muscle Cells - Umbilical Artery, donor3	hg19::chrX:45606421..45606530-
hsa-miR-222-3p	MIMAT0000279	Smooth Muscle Cells - Uterine, donor1	hg19::chrX:45606421..45606530-
hsa-miR-222-3p	MIMAT0000279	Smooth Muscle Cells - Uterine, donor3	hg19::chrX:45606421..45606530-
hsa-miR-222-3p	MIMAT0000279	spinal cord, adult, donor10252	hg19::chrX:45606421..45606530-
hsa-miR-222-3p	MIMAT0000279	Synoviocyte, donor1	hg19::chrX:45606421..45606530-
hsa-miR-222-3p	MIMAT0000279	Synoviocyte, donor2	hg19::chrX:45606421..45606530-
hsa-miR-222-3p	MIMAT0000279	Synoviocyte, donor3	hg19::chrX:45606421..45606530-
hsa-miR-222-3p	MIMAT0000279	Trabecular Meshwork Cells, donor1	hg19::chrX:45606421..45606530-
hsa-miR-222-3p	MIMAT0000279	Trabecular Meshwork Cells, donor2	hg19::chrX:45606421..45606530-
hsa-miR-222-3p	MIMAT0000279	Tracheal Epithelial Cells, donor2	hg19::chrX:45606421..45606530-
hsa-miR-222-3p	MIMAT0000279	Tracheal Epithelial Cells, donor3	hg19::chrX:45606421..45606530-
hsa-miR-222-3p	MIMAT0000279	Urothelial Cells, donor0	hg19::chrX:45606421..45606530-
hsa-miR-222-3p	MIMAT0000279	Urothelial Cells, donor1	hg19::chrX:45606421..45606530-
hsa-miR-222-3p	MIMAT0000279	Urothelial Cells, donor2	hg19::chrX:45606421..45606530-

## Sheet: Table S5
Table S5. hsa-miR-409-3p expression in all cell types across the human body as reported by the FANTOM5 consortium
MiRNA	miRNA_ID	Description	Location
hsa-miR-409-3p	MIMAT0001639	Adipocyte - breast, donor1	hg19::chr14:101531637..101531715+
hsa-miR-409-3p	MIMAT0001639	Adipocyte - breast, donor2	hg19::chr14:101531637..101531715+
hsa-miR-409-3p	MIMAT0001639	Adipocyte - omental, donor1	hg19::chr14:101531637..101531715+
hsa-miR-409-3p	MIMAT0001639	Adipocyte - omental, donor2	hg19::chr14:101531637..101531715+
hsa-miR-409-3p	MIMAT0001639	Adipocyte - omental, donor3	hg19::chr14:101531637..101531715+
hsa-miR-409-3p	MIMAT0001639	Adipocyte - perirenal, donor1	hg19::chr14:101531637..101531715+
hsa-miR-409-3p	MIMAT0001639	Adipocyte - subcutaneous, donor1	hg19::chr14:101531637..101531715+
hsa-miR-409-3p	MIMAT0001639	Adipocyte - subcutaneous, donor2	hg19::chr14:101531637..101531715+
hsa-miR-409-3p	MIMAT0001639	Adipocyte - subcutaneous, donor3	hg19::chr14:101531637..101531715+
hsa-miR-409-3p	MIMAT0001639	Alveolar Epithelial Cells, donor1	hg19::chr14:101531637..101531715+
hsa-miR-409-3p	MIMAT0001639	Alveolar Epithelial Cells, donor2	hg19::chr14:101531637..101531715+
hsa-miR-409-3p	MIMAT0001639	Alveolar Epithelial Cells, donor3	hg19::chr14:101531637..101531715+
hsa-miR-409-3p	MIMAT0001639	Amniotic Epithelial Cells, donor1	hg19::chr14:101531637..101531715+
hsa-miR-409-3p	MIMAT0001639	Amniotic Epithelial Cells, donor2	hg19::chr14:101531637..101531715+
hsa-miR-409-3p	MIMAT0001639	Amniotic Epithelial Cells, donor3	hg19::chr14:101531637..101531715+
hsa-miR-409-3p	MIMAT0001639	amniotic membrane cells, donor3
hsa-miR-409-3p	MIMAT0001639	Anulus Pulposus Cell, donor1	hg19::chr14:101531637..101531715+
hsa-miR-409-3p	MIMAT0001639	Anulus Pulposus Cell, donor2	hg19::chr14:101531637..101531715+
hsa-miR-409-3p	MIMAT0001639	Astrocyte - cerebellum, donor1	hg19::chr14:101531637..101531715+
hsa-miR-409-3p	MIMAT0001639	Astrocyte - cerebellum, donor3	hg19::chr14:101531637..101531715+
hsa-miR-409-3p	MIMAT0001639	Astrocyte - cerebral cortex, donor1	hg19::chr14:101531637..101531715+
hsa-miR-409-3p	MIMAT0001639	Astrocyte - cerebral cortex, donor2	hg19::chr14:101531637..101531715+
hsa-miR-409-3p	MIMAT0001639	Astrocyte - cerebral cortex, donor3	hg19::chr14:101531637..101531715+
hsa-miR-409-3p	MIMAT0001639	Bronchial Epithelial Cell, donor1	hg19::chr14:101531637..101531715+
hsa-miR-409-3p	MIMAT0001639	Bronchial Epithelial Cell, donor2	hg19::chr14:101531637..101531715+
hsa-miR-409-3p	MIMAT0001639	Bronchial Epithelial Cell, donor4	hg19::chr14:101531637..101531715+
hsa-miR-409-3p	MIMAT0001639	CD14+ monocyte derived endothelial progenitor cells, donor1	hg19::chr14:101531637..101531715+
hsa-miR-409-3p	MIMAT0001639	CD14+ monocyte derived endothelial progenitor cells, donor2	hg19::chr14:101531637..101531715+
hsa-miR-409-3p	MIMAT0001639	CD14+ monocyte derived endothelial progenitor cells, donor3	hg19::chr14:101531637..101531715+
hsa-miR-409-3p	MIMAT0001639	CD14+ monocytes - treated with BCG, donor4	hg19::chr14:101531637..101531715+
hsa-miR-409-3p	MIMAT0001639	CD14+ Monocytes, donor1	hg19::chr14:101531637..101531715+
hsa-miR-409-3p	MIMAT0001639	CD14+ Monocytes, donor2	hg19::chr14:101531637..101531715+
hsa-miR-409-3p	MIMAT0001639	CD14+ Monocytes, donor3	hg19::chr14:101531637..101531715+
hsa-miR-409-3p	MIMAT0001639	CD19+ B Cells, donor1	hg19::chr14:101531637..101531715+
hsa-miR-409-3p	MIMAT0001639	CD19+ B Cells, donor2	hg19::chr14:101531637..101531715+
hsa-miR-409-3p	MIMAT0001639	CD19+ B Cells, donor3	hg19::chr14:101531637..101531715+
hsa-miR-409-3p	MIMAT0001639	CD19+ B Lymphocytes (cytosolic)	hg19::chr14:101531637..101531715+
hsa-miR-409-3p	MIMAT0001639	CD19+ B Lymphocytes (nuclear)	hg19::chr14:101531637..101531715+
hsa-miR-409-3p	MIMAT0001639	CD3+ T Lymphocytes (cytosolic)	hg19::chr14:101531637..101531715+
hsa-miR-409-3p	MIMAT0001639	CD3+ T Lymphocytes (nuclear)	hg19::chr14:101531637..101531715+
hsa-miR-409-3p	MIMAT0001639	CD4+ T Cells, donor1	hg19::chr14:101531637..101531715+
hsa-miR-409-3p	MIMAT0001639	CD4+ T Cells, donor2	hg19::chr14:101531637..101531715+
hsa-miR-409-3p	MIMAT0001639	CD4+ T Cells, donor3	hg19::chr14:101531637..101531715+
hsa-miR-409-3p	MIMAT0001639	CD8+ T Cells, donor1	hg19::chr14:101531637..101531715+
hsa-miR-409-3p	MIMAT0001639	CD8+ T Cells, donor2	hg19::chr14:101531637..101531715+
hsa-miR-409-3p	MIMAT0001639	CD8+ T Cells, donor3	hg19::chr14:101531637..101531715+
hsa-miR-409-3p	MIMAT0001639	Chondrocyte - de diff, donor1	hg19::chr14:101531637..101531715+
hsa-miR-409-3p	MIMAT0001639	Chondrocyte - de diff, donor2	hg19::chr14:101531637..101531715+
hsa-miR-409-3p	MIMAT0001639	Chondrocyte - de diff, donor3	hg19::chr14:101531637..101531715+
hsa-miR-409-3p	MIMAT0001639	Chondrocyte - re diff, donor1	hg19::chr14:101531637..101531715+
hsa-miR-409-3p	MIMAT0001639	Chondrocyte - re diff, donor2	hg19::chr14:101531637..101531715+
hsa-miR-409-3p	MIMAT0001639	Chondrocyte - re diff, donor3	hg19::chr14:101531637..101531715+
hsa-miR-409-3p	MIMAT0001639	chorionic membrane cells, donor3	hg19::chr14:101531637..101531715+
hsa-miR-409-3p	MIMAT0001639	Ciliary Epithelial Cells, donor1	hg19::chr14:101531637..101531715+
hsa-miR-409-3p	MIMAT0001639	Ciliary Epithelial Cells, donor2	hg19::chr14:101531637..101531715+
hsa-miR-409-3p	MIMAT0001639	Ciliary Epithelial Cells, donor3	hg19::chr14:101531637..101531715+
hsa-miR-409-3p	MIMAT0001639	COBL-a rinderpest infection, 00hr, biol_rep1	hg19::chr14:101531637..101531715+
hsa-miR-409-3p	MIMAT0001639	COBL-a rinderpest infection, 00hr, biol_rep2	hg19::chr14:101531637..101531715+
hsa-miR-409-3p	MIMAT0001639	COBL-a rinderpest infection, 00hr, biol_rep3	hg19::chr14:101531637..101531715+
hsa-miR-409-3p	MIMAT0001639	COBL-a rinderpest infection, 24hr, biol_rep1	hg19::chr14:101531637..101531715+
hsa-miR-409-3p	MIMAT0001639	COBL-a rinderpest infection, 24hr, biol_rep2	hg19::chr14:101531637..101531715+
hsa-miR-409-3p	MIMAT0001639	COBL-a rinderpest infection, 24hr, biol_rep3	hg19::chr14:101531637..101531715+
hsa-miR-409-3p	MIMAT0001639	COBL-a rinderpest(-C) infection, 24hr, biol_rep1	hg19::chr14:101531637..101531715+
hsa-miR-409-3p	MIMAT0001639	COBL-a rinderpest(-C) infection, 24hr, biol_rep2	hg19::chr14:101531637..101531715+
hsa-miR-409-3p	MIMAT0001639	COBL-a rinderpest(-C) infection, 24hr, biol_rep3	hg19::chr14:101531637..101531715+
hsa-miR-409-3p	MIMAT0001639	Corneal Epithelial Cells, donor1	hg19::chr14:101531637..101531715+
hsa-miR-409-3p	MIMAT0001639	Corneal Epithelial Cells, donor2	hg19::chr14:101531637..101531715+
hsa-miR-409-3p	MIMAT0001639	Corneal Epithelial Cells, donor3	hg19::chr14:101531637..101531715+
hsa-miR-409-3p	MIMAT0001639	Dendritic Cells - monocyte immature derived, donor1	hg19::chr14:101531637..101531715+
hsa-miR-409-3p	MIMAT0001639	Dendritic Cells - monocyte immature derived, donor2	hg19::chr14:101531637..101531715+
hsa-miR-409-3p	MIMAT0001639	Dendritic Cells - monocyte immature derived, donor3	hg19::chr14:101531637..101531715+
hsa-miR-409-3p	MIMAT0001639	Embryonic Stem cell (cytosolic)	hg19::chr14:101531637..101531715+
hsa-miR-409-3p	MIMAT0001639	Embryonic Stem cell (cytosolic)	hg19::chr14:101531637..101531715+
hsa-miR-409-3p	MIMAT0001639	Embryonic Stem cell (cytosolic)	hg19::chr14:101531637..101531715+
hsa-miR-409-3p	MIMAT0001639	Embryonic Stem cell (nuclear)	hg19::chr14:101531637..101531715+
hsa-miR-409-3p	MIMAT0001639	Embryonic Stem cell (nuclear)	hg19::chr14:101531637..101531715+
hsa-miR-409-3p	MIMAT0001639	Embryonic Stem cell (nuclear)	hg19::chr14:101531637..101531715+
hsa-miR-409-3p	MIMAT0001639	Endothelial Cells - Aortic, donor0	hg19::chr14:101531637..101531715+
hsa-miR-409-3p	MIMAT0001639	Endothelial Cells - Aortic, donor1	hg19::chr14:101531637..101531715+
hsa-miR-409-3p	MIMAT0001639	Endothelial Cells - Aortic, donor2	hg19::chr14:101531637..101531715+
hsa-miR-409-3p	MIMAT0001639	Endothelial Cells - Aortic, donor3	hg19::chr14:101531637..101531715+
hsa-miR-409-3p	MIMAT0001639	Endothelial Cells - Artery, donor1	hg19::chr14:101531637..101531715+
hsa-miR-409-3p	MIMAT0001639	Endothelial Cells - Artery, donor2	hg19::chr14:101531637..101531715+
hsa-miR-409-3p	MIMAT0001639	Endothelial Cells - Artery, donor3	hg19::chr14:101531637..101531715+
hsa-miR-409-3p	MIMAT0001639	Endothelial Cells - Lymphatic, donor1	hg19::chr14:101531637..101531715+
hsa-miR-409-3p	MIMAT0001639	Endothelial Cells - Lymphatic, donor2	hg19::chr14:101531637..101531715+
hsa-miR-409-3p	MIMAT0001639	Endothelial Cells - Lymphatic, donor3	hg19::chr14:101531637..101531715+
hsa-miR-409-3p	MIMAT0001639	Endothelial Cells - Microvascular, donor1	hg19::chr14:101531637..101531715+
hsa-miR-409-3p	MIMAT0001639	Endothelial Cells - Microvascular, donor3	hg19::chr14:101531637..101531715+
hsa-miR-409-3p	MIMAT0001639	Endothelial Cells - Thoracic, donor1	hg19::chr14:101531637..101531715+
hsa-miR-409-3p	MIMAT0001639	Endothelial Cells - Thoracic, donor2	hg19::chr14:101531637..101531715+
hsa-miR-409-3p	MIMAT0001639	Endothelial Cells - Umbilical vein, donor1	hg19::chr14:101531637..101531715+
hsa-miR-409-3p	MIMAT0001639	Endothelial Cells - Umbilical vein, donor2	hg19::chr14:101531637..101531715+
hsa-miR-409-3p	MIMAT0001639	Endothelial Cells - Umbilical vein, donor3	hg19::chr14:101531637..101531715+
hsa-miR-409-3p	MIMAT0001639	Endothelial Cells - Vein, donor1	hg19::chr14:101531637..101531715+
hsa-miR-409-3p	MIMAT0001639	Endothelial Cells - Vein, donor2	hg19::chr14:101531637..101531715+
hsa-miR-409-3p	MIMAT0001639	Endothelial Cells - Vein, donor3	hg19::chr14:101531637..101531715+
hsa-miR-409-3p	MIMAT0001639	Esophageal Epithelial Cells, donor1	hg19::chr14:101531637..101531715+
hsa-miR-409-3p	MIMAT0001639	Esophageal Epithelial Cells, donor2	hg19::chr14:101531637..101531715+
hsa-miR-409-3p	MIMAT0001639	Fibroblast - Aortic Adventitial, donor1	hg19::chr14:101531637..101531715+
hsa-miR-409-3p	MIMAT0001639	Fibroblast - Aortic Adventitial, donor2	hg19::chr14:101531637..101531715+
hsa-miR-409-3p	MIMAT0001639	Fibroblast - Aortic Adventitial, donor2 (nuclear fraction)	hg19::chr14:101531637..101531715+
hsa-miR-409-3p	MIMAT0001639	Fibroblast - Aortic Adventitial, donor3	hg19::chr14:101531637..101531715+
hsa-miR-409-3p	MIMAT0001639	Fibroblast - Aortic Adventitial, donor3 (nuclear fraction)	hg19::chr14:101531637..101531715+
hsa-miR-409-3p	MIMAT0001639	Fibroblast - Cardiac, donor1	hg19::chr14:101531637..101531715+
hsa-miR-409-3p	MIMAT0001639	Fibroblast - Cardiac, donor2	hg19::chr14:101531637..101531715+
hsa-miR-409-3p	MIMAT0001639	Fibroblast - Cardiac, donor3	hg19::chr14:101531637..101531715+
hsa-miR-409-3p	MIMAT0001639	Fibroblast - Choroid Plexus, donor1	hg19::chr14:101531637..101531715+
hsa-miR-409-3p	MIMAT0001639	Fibroblast - Conjunctival, donor1	hg19::chr14:101531637..101531715+
hsa-miR-409-3p	MIMAT0001639	Fibroblast - Dermal (cytosolic)	hg19::chr14:101531637..101531715+
hsa-miR-409-3p	MIMAT0001639	Fibroblast - Dermal (nuclear)	hg19::chr14:101531637..101531715+
hsa-miR-409-3p	MIMAT0001639	Fibroblast - Dermal, donor1	hg19::chr14:101531637..101531715+
hsa-miR-409-3p	MIMAT0001639	Fibroblast - Dermal, donor2	hg19::chr14:101531637..101531715+
hsa-miR-409-3p	MIMAT0001639	Fibroblast - Dermal, donor3	hg19::chr14:101531637..101531715+
hsa-miR-409-3p	MIMAT0001639	Fibroblast - Gingival, donor1	hg19::chr14:101531637..101531715+
hsa-miR-409-3p	MIMAT0001639	Fibroblast - Gingival, donor2	hg19::chr14:101531637..101531715+
hsa-miR-409-3p	MIMAT0001639	Fibroblast - Gingival, donor3	hg19::chr14:101531637..101531715+
hsa-miR-409-3p	MIMAT0001639	Fibroblast - Lung, donor1	hg19::chr14:101531637..101531715+
hsa-miR-409-3p	MIMAT0001639	Fibroblast - Lung, donor2	hg19::chr14:101531637..101531715+
hsa-miR-409-3p	MIMAT0001639	Fibroblast - Lung, donor3	hg19::chr14:101531637..101531715+
hsa-miR-409-3p	MIMAT0001639	Fibroblast - Lymphatic, donor1	hg19::chr14:101531637..101531715+
hsa-miR-409-3p	MIMAT0001639	Fibroblast - Lymphatic, donor2	hg19::chr14:101531637..101531715+
hsa-miR-409-3p	MIMAT0001639	Fibroblast - Lymphatic, donor3	hg19::chr14:101531637..101531715+
hsa-miR-409-3p	MIMAT0001639	Fibroblast - Mammary, donor1	hg19::chr14:101531637..101531715+
hsa-miR-409-3p	MIMAT0001639	Fibroblast - Mammary, donor2	hg19::chr14:101531637..101531715+
hsa-miR-409-3p	MIMAT0001639	Fibroblast - Mammary, donor3	hg19::chr14:101531637..101531715+
hsa-miR-409-3p	MIMAT0001639	Fibroblast - Periodontal Ligament, donor1	hg19::chr14:101531637..101531715+
hsa-miR-409-3p	MIMAT0001639	Fibroblast - Periodontal Ligament, donor2	hg19::chr14:101531637..101531715+
hsa-miR-409-3p	MIMAT0001639	Fibroblast - Periodontal Ligament, donor3	hg19::chr14:101531637..101531715+
hsa-miR-409-3p	MIMAT0001639	Fibroblast - Pulmonary Artery, donor1	hg19::chr14:101531637..101531715+
hsa-miR-409-3p	MIMAT0001639	Fibroblast - skin normal, donor2 (nuclear fraction)	hg19::chr14:101531637..101531715+
hsa-miR-409-3p	MIMAT0001639	Fibroblast - Villous Mesenchymal, donor1	hg19::chr14:101531637..101531715+
hsa-miR-409-3p	MIMAT0001639	Gingival epithelial cells, donor2 (GEA14)	hg19::chr14:101531637..101531715+
hsa-miR-409-3p	MIMAT0001639	Gingival epithelial cells, donor3 (GEA15)	hg19::chr14:101531637..101531715+
hsa-miR-409-3p	MIMAT0001639	H9 Embryonic Stem cells, biol_rep1 (H9ES-1)	hg19::chr14:101531637..101531715+
hsa-miR-409-3p	MIMAT0001639	Hair Follicle Dermal Papilla Cells, donor1	hg19::chr14:101531637..101531715+
hsa-miR-409-3p	MIMAT0001639	Hair Follicle Dermal Papilla Cells, donor2	hg19::chr14:101531637..101531715+
hsa-miR-409-3p	MIMAT0001639	Hair Follicle Dermal Papilla Cells, donor3	hg19::chr14:101531637..101531715+
hsa-miR-409-3p	MIMAT0001639	Hepatic Sinusoidal Endothelial Cells, donor1	hg19::chr14:101531637..101531715+
hsa-miR-409-3p	MIMAT0001639	Hepatic Sinusoidal Endothelial Cells, donor2	hg19::chr14:101531637..101531715+
hsa-miR-409-3p	MIMAT0001639	Hepatic Stellate Cells (lipocyte), donor1	hg19::chr14:101531637..101531715+
hsa-miR-409-3p	MIMAT0001639	Hepatic Stellate Cells (lipocyte), donor2	hg19::chr14:101531637..101531715+
hsa-miR-409-3p	MIMAT0001639	Hepatocyte, donor1	hg19::chr14:101531637..101531715+
hsa-miR-409-3p	MIMAT0001639	Hepatocyte, donor2	hg19::chr14:101531637..101531715+
hsa-miR-409-3p	MIMAT0001639	Hepatocyte, donor3	hg19::chr14:101531637..101531715+
hsa-miR-409-3p	MIMAT0001639	Intestinal epithelial cells (polarized), donor1	hg19::chr14:101531637..101531715+
hsa-miR-409-3p	MIMAT0001639	iPS derived from CD19+ B Lymphocytes (cytosolic)	hg19::chr14:101531637..101531715+
hsa-miR-409-3p	MIMAT0001639	iPS derived from CD19+ B Lymphocytes (nuclear)	hg19::chr14:101531637..101531715+
hsa-miR-409-3p	MIMAT0001639	iPS derived from CD3+ T Lymphocytes (cytosolic)	hg19::chr14:101531637..101531715+
hsa-miR-409-3p	MIMAT0001639	iPS derived from CD3+ T Lymphocytes (nuclear)	hg19::chr14:101531637..101531715+
hsa-miR-409-3p	MIMAT0001639	iPS derived from Dermal Fibroblast (cytosolic)	hg19::chr14:101531637..101531715+
hsa-miR-409-3p	MIMAT0001639	iPS derived from Dermal Fibroblast (nuclear)	hg19::chr14:101531637..101531715+
hsa-miR-409-3p	MIMAT0001639	Keratinocyte - epidermal, donor1	hg19::chr14:101531637..101531715+
hsa-miR-409-3p	MIMAT0001639	Keratinocyte - epidermal, donor2	hg19::chr14:101531637..101531715+
hsa-miR-409-3p	MIMAT0001639	Keratinocyte - epidermal, donor3	hg19::chr14:101531637..101531715+
hsa-miR-409-3p	MIMAT0001639	Keratinocyte - oral, donor1	hg19::chr14:101531637..101531715+
hsa-miR-409-3p	MIMAT0001639	Keratocytes, donor1	hg19::chr14:101531637..101531715+
hsa-miR-409-3p	MIMAT0001639	Keratocytes, donor2	hg19::chr14:101531637..101531715+
hsa-miR-409-3p	MIMAT0001639	Lymphatic Endothelial cells response to VEGFC, 00hr00min, biol_rep1 (MM XIX - 1)	hg19::chr14:101531637..101531715+
hsa-miR-409-3p	MIMAT0001639	Lymphatic Endothelial cells response to VEGFC, 00hr00min, biol_rep2 (MM XIV - 1)	hg19::chr14:101531637..101531715+
hsa-miR-409-3p	MIMAT0001639	Lymphatic Endothelial cells response to VEGFC, 00hr00min, biol_rep3 (MM XXII - 1)	hg19::chr14:101531637..101531715+
hsa-miR-409-3p	MIMAT0001639	Lymphatic Endothelial cells response to VEGFC, 01hr00min, biol_rep1 (MM XIX - 5)	hg19::chr14:101531637..101531715+
hsa-miR-409-3p	MIMAT0001639	Lymphatic Endothelial cells response to VEGFC, 01hr00min, biol_rep2 (MM XIV - 5)	hg19::chr14:101531637..101531715+
hsa-miR-409-3p	MIMAT0001639	Lymphatic Endothelial cells response to VEGFC, 01hr00min, biol_rep3 (MM XXII - 5)	hg19::chr14:101531637..101531715+
hsa-miR-409-3p	MIMAT0001639	Lymphatic Endothelial cells response to VEGFC, 02hr00min, biol_rep1 (MM XIX - 8)	hg19::chr14:101531637..101531715+
hsa-miR-409-3p	MIMAT0001639	Lymphatic Endothelial cells response to VEGFC, 02hr00min, biol_rep2 (MM XIV - 8)	hg19::chr14:101531637..101531715+
hsa-miR-409-3p	MIMAT0001639	Lymphatic Endothelial cells response to VEGFC, 02hr00min, biol_rep3 (MM XXII - 8)	hg19::chr14:101531637..101531715+
hsa-miR-409-3p	MIMAT0001639	Lymphatic Endothelial cells response to VEGFC, 04hr00min, biol_rep1 (MM XIX - 12)	hg19::chr14:101531637..101531715+
hsa-miR-409-3p	MIMAT0001639	Lymphatic Endothelial cells response to VEGFC, 04hr00min, biol_rep2 (MM XIV - 12)	hg19::chr14:101531637..101531715+
hsa-miR-409-3p	MIMAT0001639	Lymphatic Endothelial cells response to VEGFC, 04hr00min, biol_rep3 (MM XXII - 12)	hg19::chr14:101531637..101531715+
hsa-miR-409-3p	MIMAT0001639	Lymphatic Endothelial cells response to VEGFC, 08hr00min, biol_rep1 (MM XIX - 16)	hg19::chr14:101531637..101531715+
hsa-miR-409-3p	MIMAT0001639	Lymphatic Endothelial cells response to VEGFC, 08hr00min, biol_rep2 (MM XIV - 16)	hg19::chr14:101531637..101531715+
hsa-miR-409-3p	MIMAT0001639	Lymphatic Endothelial cells response to VEGFC, 08hr00min, biol_rep3 (MM XXII - 16)	hg19::chr14:101531637..101531715+
hsa-miR-409-3p	MIMAT0001639	Macrophage - monocyte derived, donor1	hg19::chr14:101531637..101531715+
hsa-miR-409-3p	MIMAT0001639	Macrophage - monocyte derived, donor2	hg19::chr14:101531637..101531715+
hsa-miR-409-3p	MIMAT0001639	Macrophage - monocyte derived, donor3	hg19::chr14:101531637..101531715+
hsa-miR-409-3p	MIMAT0001639	Mammary Epithelial Cell, donor1	hg19::chr14:101531637..101531715+
hsa-miR-409-3p	MIMAT0001639	Mammary Epithelial Cell, donor2	hg19::chr14:101531637..101531715+
hsa-miR-409-3p	MIMAT0001639	Mammary Epithelial Cell, donor3	hg19::chr14:101531637..101531715+
hsa-miR-409-3p	MIMAT0001639	Mast cell - stimulated, donor1	hg19::chr14:101531637..101531715+
hsa-miR-409-3p	MIMAT0001639	Mast cell, donor2	hg19::chr14:101531637..101531715+
hsa-miR-409-3p	MIMAT0001639	Mast cell, donor3	hg19::chr14:101531637..101531715+
hsa-miR-409-3p	MIMAT0001639	Mast cell, donor4	hg19::chr14:101531637..101531715+
hsa-miR-409-3p	MIMAT0001639	MCF7 breast cancer cell line response to EGF1, 00hr00min, biol_rep1	hg19::chr14:101531637..101531715+
hsa-miR-409-3p	MIMAT0001639	MCF7 breast cancer cell line response to EGF1, 00hr00min, biol_rep2	hg19::chr14:101531637..101531715+
hsa-miR-409-3p	MIMAT0001639	MCF7 breast cancer cell line response to EGF1, 00hr00min, biol_rep3	hg19::chr14:101531637..101531715+
hsa-miR-409-3p	MIMAT0001639	MCF7 breast cancer cell line response to HRG, 00hr15min, biol_rep1	hg19::chr14:101531637..101531715+
hsa-miR-409-3p	MIMAT0001639	MCF7 breast cancer cell line response to HRG, 00hr15min, biol_rep2	hg19::chr14:101531637..101531715+
hsa-miR-409-3p	MIMAT0001639	MCF7 breast cancer cell line response to HRG, 00hr15min, biol_rep3	hg19::chr14:101531637..101531715+
hsa-miR-409-3p	MIMAT0001639	MCF7 breast cancer cell line response to HRG, 00hr30min, biol_rep1	hg19::chr14:101531637..101531715+
hsa-miR-409-3p	MIMAT0001639	MCF7 breast cancer cell line response to HRG, 00hr30min, biol_rep2	hg19::chr14:101531637..101531715+
hsa-miR-409-3p	MIMAT0001639	MCF7 breast cancer cell line response to HRG, 00hr30min, biol_rep3	hg19::chr14:101531637..101531715+
hsa-miR-409-3p	MIMAT0001639	MCF7 breast cancer cell line response to HRG, 00hr45min, biol_rep1	hg19::chr14:101531637..101531715+
hsa-miR-409-3p	MIMAT0001639	MCF7 breast cancer cell line response to HRG, 00hr45min, biol_rep2	hg19::chr14:101531637..101531715+
hsa-miR-409-3p	MIMAT0001639	MCF7 breast cancer cell line response to HRG, 00hr45min, biol_rep3	hg19::chr14:101531637..101531715+
hsa-miR-409-3p	MIMAT0001639	MCF7 breast cancer cell line response to HRG, 01hr00min, biol_rep1	hg19::chr14:101531637..101531715+
hsa-miR-409-3p	MIMAT0001639	MCF7 breast cancer cell line response to HRG, 01hr00min, biol_rep2	hg19::chr14:101531637..101531715+
hsa-miR-409-3p	MIMAT0001639	MCF7 breast cancer cell line response to HRG, 01hr00min, biol_rep3	hg19::chr14:101531637..101531715+
hsa-miR-409-3p	MIMAT0001639	MCF7 breast cancer cell line response to HRG, 01hr20min, biol_rep1	hg19::chr14:101531637..101531715+
hsa-miR-409-3p	MIMAT0001639	MCF7 breast cancer cell line response to HRG, 01hr20min, biol_rep2	hg19::chr14:101531637..101531715+
hsa-miR-409-3p	MIMAT0001639	MCF7 breast cancer cell line response to HRG, 01hr20min, biol_rep3	hg19::chr14:101531637..101531715+
hsa-miR-409-3p	MIMAT0001639	MCF7 breast cancer cell line response to HRG, 01hr40min, biol_rep1	hg19::chr14:101531637..101531715+
hsa-miR-409-3p	MIMAT0001639	MCF7 breast cancer cell line response to HRG, 01hr40min, biol_rep2	hg19::chr14:101531637..101531715+
hsa-miR-409-3p	MIMAT0001639	MCF7 breast cancer cell line response to HRG, 01hr40min, biol_rep3	hg19::chr14:101531637..101531715+
hsa-miR-409-3p	MIMAT0001639	MCF7 breast cancer cell line response to HRG, 04hr, biol_rep1	hg19::chr14:101531637..101531715+
hsa-miR-409-3p	MIMAT0001639	MCF7 breast cancer cell line response to HRG, 04hr, biol_rep2	hg19::chr14:101531637..101531715+
hsa-miR-409-3p	MIMAT0001639	MCF7 breast cancer cell line response to HRG, 04hr, biol_rep3	hg19::chr14:101531637..101531715+
hsa-miR-409-3p	MIMAT0001639	MCF7 breast cancer cell line response to HRG, 08hr, biol_rep2	hg19::chr14:101531637..101531715+
hsa-miR-409-3p	MIMAT0001639	MCF7 breast cancer cell line response to HRG, 08hr, biol_rep3	hg19::chr14:101531637..101531715+
hsa-miR-409-3p	MIMAT0001639	Melanocyte - light, donor1	hg19::chr14:101531637..101531715+
hsa-miR-409-3p	MIMAT0001639	Melanocyte - light, donor2	hg19::chr14:101531637..101531715+
hsa-miR-409-3p	MIMAT0001639	Melanocyte - light, donor3	hg19::chr14:101531637..101531715+
hsa-miR-409-3p	MIMAT0001639	Meningeal Cells, donor1	hg19::chr14:101531637..101531715+
hsa-miR-409-3p	MIMAT0001639	Meningeal Cells, donor2	hg19::chr14:101531637..101531715+
hsa-miR-409-3p	MIMAT0001639	Mesenchymal Stem Cells - adipose, donor0	hg19::chr14:101531637..101531715+
hsa-miR-409-3p	MIMAT0001639	Mesenchymal Stem Cells - adipose, donor1	hg19::chr14:101531637..101531715+
hsa-miR-409-3p	MIMAT0001639	Mesenchymal Stem Cells - adipose, donor2	hg19::chr14:101531637..101531715+
hsa-miR-409-3p	MIMAT0001639	Mesenchymal Stem Cells - amniotic membrane, donor1	hg19::chr14:101531637..101531715+
hsa-miR-409-3p	MIMAT0001639	Mesenchymal Stem Cells - amniotic membrane, donor2	hg19::chr14:101531637..101531715+
hsa-miR-409-3p	MIMAT0001639	Mesenchymal Stem Cells - bone marrow, donor1	hg19::chr14:101531637..101531715+
hsa-miR-409-3p	MIMAT0001639	Mesenchymal Stem Cells - bone marrow, donor3	hg19::chr14:101531637..101531715+
hsa-miR-409-3p	MIMAT0001639	Mesenchymal Stem Cells - bone marrow, donor4	hg19::chr14:101531637..101531715+
hsa-miR-409-3p	MIMAT0001639	Mesenchymal Stem Cells - hepatic, donor0	hg19::chr14:101531637..101531715+
hsa-miR-409-3p	MIMAT0001639	Mesenchymal Stem Cells - hepatic, donor1	hg19::chr14:101531637..101531715+
hsa-miR-409-3p	MIMAT0001639	Mesenchymal Stem Cells - umbilical, donor0	hg19::chr14:101531637..101531715+
hsa-miR-409-3p	MIMAT0001639	Mesenchymal Stem Cells - umbilical, donor1	hg19::chr14:101531637..101531715+
hsa-miR-409-3p	MIMAT0001639	Mesenchymal Stem Cells - umbilical, donor2	hg19::chr14:101531637..101531715+
hsa-miR-409-3p	MIMAT0001639	Mesenchymal Stem Cells - umbilical, donor3	hg19::chr14:101531637..101531715+
hsa-miR-409-3p	MIMAT0001639	Mesenchymal Stem Cells - Vertebral, donor1	hg19::chr14:101531637..101531715+
hsa-miR-409-3p	MIMAT0001639	Mesenchymal Stem Cells - Wharton's Jelly, donor1	hg19::chr14:101531637..101531715+
hsa-miR-409-3p	MIMAT0001639	mesenchymal stem cells (adipose derived), adipogenic induction, 00hr00min, biol_rep1	hg19::chr14:101531637..101531715+
hsa-miR-409-3p	MIMAT0001639	mesenchymal stem cells (adipose derived), adipogenic induction, 00hr00min, biol_rep2	hg19::chr14:101531637..101531715+
hsa-miR-409-3p	MIMAT0001639	mesenchymal stem cells (adipose derived), adipogenic induction, 00hr00min, biol_rep3	hg19::chr14:101531637..101531715+
hsa-miR-409-3p	MIMAT0001639	mesenchymal stem cells (adipose derived), adipogenic induction, 02hr00min, biol_rep1	hg19::chr14:101531637..101531715+
hsa-miR-409-3p	MIMAT0001639	mesenchymal stem cells (adipose derived), adipogenic induction, 02hr00min, biol_rep2	hg19::chr14:101531637..101531715+
hsa-miR-409-3p	MIMAT0001639	mesenchymal stem cells (adipose derived), adipogenic induction, 02hr00min, biol_rep3	hg19::chr14:101531637..101531715+
hsa-miR-409-3p	MIMAT0001639	mesenchymal stem cells (adipose derived), adipogenic induction, 12hr00min, biol_rep1	hg19::chr14:101531637..101531715+
hsa-miR-409-3p	MIMAT0001639	mesenchymal stem cells (adipose derived), adipogenic induction, 12hr00min, biol_rep2	hg19::chr14:101531637..101531715+
hsa-miR-409-3p	MIMAT0001639	mesenchymal stem cells (adipose derived), adipogenic induction, 12hr00min, biol_rep3	hg19::chr14:101531637..101531715+
hsa-miR-409-3p	MIMAT0001639	mesenchymal stem cells (adipose derived), adipogenic induction, day02, biol_rep1	hg19::chr14:101531637..101531715+
hsa-miR-409-3p	MIMAT0001639	mesenchymal stem cells (adipose derived), adipogenic induction, day02, biol_rep2	hg19::chr14:101531637..101531715+
hsa-miR-409-3p	MIMAT0001639	mesenchymal stem cells (adipose derived), adipogenic induction, day02, biol_rep3	hg19::chr14:101531637..101531715+
hsa-miR-409-3p	MIMAT0001639	mesenchymal stem cells (adipose derived), adipogenic induction, day04, biol_rep1	hg19::chr14:101531637..101531715+
hsa-miR-409-3p	MIMAT0001639	mesenchymal stem cells (adipose derived), adipogenic induction, day04, biol_rep2	hg19::chr14:101531637..101531715+
hsa-miR-409-3p	MIMAT0001639	mesenchymal stem cells (adipose derived), adipogenic induction, day04, biol_rep3	hg19::chr14:101531637..101531715+
hsa-miR-409-3p	MIMAT0001639	mesenchymal stem cells (adipose derived), adipogenic induction, day08, biol_rep1	hg19::chr14:101531637..101531715+
hsa-miR-409-3p	MIMAT0001639	mesenchymal stem cells (adipose derived), adipogenic induction, day08, biol_rep2	hg19::chr14:101531637..101531715+
hsa-miR-409-3p	MIMAT0001639	mesenchymal stem cells (adipose derived), adipogenic induction, day08, biol_rep3	hg19::chr14:101531637..101531715+
hsa-miR-409-3p	MIMAT0001639	mesenchymal stem cells (adipose derived), adipogenic induction, day12, biol_rep1	hg19::chr14:101531637..101531715+
hsa-miR-409-3p	MIMAT0001639	mesenchymal stem cells (adipose derived), adipogenic induction, day12, biol_rep2	hg19::chr14:101531637..101531715+
hsa-miR-409-3p	MIMAT0001639	mesenchymal stem cells (adipose derived), adipogenic induction, day12, biol_rep3	hg19::chr14:101531637..101531715+
hsa-miR-409-3p	MIMAT0001639	Mesothelial Cells, donor1	hg19::chr14:101531637..101531715+
hsa-miR-409-3p	MIMAT0001639	Mesothelial Cells, donor3	hg19::chr14:101531637..101531715+
hsa-miR-409-3p	MIMAT0001639	Multipotent Cord Blood Unrestricted Somatic Stem Cells, donor1	hg19::chr14:101531637..101531715+
hsa-miR-409-3p	MIMAT0001639	Multipotent Cord Blood Unrestricted Somatic Stem Cells, donor2	hg19::chr14:101531637..101531715+
hsa-miR-409-3p	MIMAT0001639	Myoblast, donor1	hg19::chr14:101531637..101531715+
hsa-miR-409-3p	MIMAT0001639	Myoblast, donor2	hg19::chr14:101531637..101531715+
hsa-miR-409-3p	MIMAT0001639	Myoblast, donor3	hg19::chr14:101531637..101531715+
hsa-miR-409-3p	MIMAT0001639	Natural Killer Cells, donor1	hg19::chr14:101531637..101531715+
hsa-miR-409-3p	MIMAT0001639	Natural Killer Cells, donor2	hg19::chr14:101531637..101531715+
hsa-miR-409-3p	MIMAT0001639	Natural Killer Cells, donor3	hg19::chr14:101531637..101531715+
hsa-miR-409-3p	MIMAT0001639	Neural stem cells, donor2	hg19::chr14:101531637..101531715+
hsa-miR-409-3p	MIMAT0001639	Neural stem cells, donor3	hg19::chr14:101531637..101531715+
hsa-miR-409-3p	MIMAT0001639	Neutrophils, donor1	hg19::chr14:101531637..101531715+
hsa-miR-409-3p	MIMAT0001639	Neutrophils, donor2	hg19::chr14:101531637..101531715+
hsa-miR-409-3p	MIMAT0001639	Neutrophils, donor3	hg19::chr14:101531637..101531715+
hsa-miR-409-3p	MIMAT0001639	Nucleus Pulposus Cell, donor1	hg19::chr14:101531637..101531715+
hsa-miR-409-3p	MIMAT0001639	Nucleus Pulposus Cell, donor3	hg19::chr14:101531637..101531715+
hsa-miR-409-3p	MIMAT0001639	Osteoblast - differentiated, donor1	hg19::chr14:101531637..101531715+
hsa-miR-409-3p	MIMAT0001639	Osteoblast - differentiated, donor2	hg19::chr14:101531637..101531715+
hsa-miR-409-3p	MIMAT0001639	Osteoblast - differentiated, donor3	hg19::chr14:101531637..101531715+
hsa-miR-409-3p	MIMAT0001639	Osteoblast, donor1	hg19::chr14:101531637..101531715+
hsa-miR-409-3p	MIMAT0001639	Osteoblast, donor2	hg19::chr14:101531637..101531715+
hsa-miR-409-3p	MIMAT0001639	Osteoblast, donor3	hg19::chr14:101531637..101531715+
hsa-miR-409-3p	MIMAT0001639	Pancreatic stromal cells, donor1	hg19::chr14:101531637..101531715+
hsa-miR-409-3p	MIMAT0001639	Pericytes, donor1	hg19::chr14:101531637..101531715+
hsa-miR-409-3p	MIMAT0001639	Pericytes, donor3	hg19::chr14:101531637..101531715+
hsa-miR-409-3p	MIMAT0001639	Peripheral Blood Mononuclear Cells, donor1	hg19::chr14:101531637..101531715+
hsa-miR-409-3p	MIMAT0001639	Peripheral Blood Mononuclear Cells, donor2	hg19::chr14:101531637..101531715+
hsa-miR-409-3p	MIMAT0001639	Peripheral Blood Mononuclear Cells, donor3	hg19::chr14:101531637..101531715+
hsa-miR-409-3p	MIMAT0001639	pineal gland, adult, donor10252	hg19::chr14:101531637..101531715+
hsa-miR-409-3p	MIMAT0001639	pituitary gland, adult, donor10252	hg19::chr14:101531637..101531715+
hsa-miR-409-3p	MIMAT0001639	Placental Epithelial Cells, donor1	hg19::chr14:101531637..101531715+
hsa-miR-409-3p	MIMAT0001639	Placental Epithelial Cells, donor2	hg19::chr14:101531637..101531715+
hsa-miR-409-3p	MIMAT0001639	Placental Epithelial Cells, donor3	hg19::chr14:101531637..101531715+
hsa-miR-409-3p	MIMAT0001639	Preadipocyte - breast, donor2	hg19::chr14:101531637..101531715+
hsa-miR-409-3p	MIMAT0001639	Preadipocyte - breast, donor2 (nuclear fraction)	hg19::chr14:101531637..101531715+
hsa-miR-409-3p	MIMAT0001639	Preadipocyte - omental, donor1	hg19::chr14:101531637..101531715+
hsa-miR-409-3p	MIMAT0001639	Preadipocyte - omental, donor2	hg19::chr14:101531637..101531715+
hsa-miR-409-3p	MIMAT0001639	Preadipocyte - omental, donor3	hg19::chr14:101531637..101531715+
hsa-miR-409-3p	MIMAT0001639	Preadipocyte - perirenal, donor1	hg19::chr14:101531637..101531715+
hsa-miR-409-3p	MIMAT0001639	Preadipocyte - subcutaneous, donor1	hg19::chr14:101531637..101531715+
hsa-miR-409-3p	MIMAT0001639	Preadipocyte - subcutaneous, donor2	hg19::chr14:101531637..101531715+
hsa-miR-409-3p	MIMAT0001639	Preadipocyte - subcutaneous, donor3	hg19::chr14:101531637..101531715+
hsa-miR-409-3p	MIMAT0001639	Preadipocyte - visceral, donor1	hg19::chr14:101531637..101531715+
hsa-miR-409-3p	MIMAT0001639	Preadipocyte - visceral, donor2	hg19::chr14:101531637..101531715+
hsa-miR-409-3p	MIMAT0001639	Preadipocyte - visceral, donor3	hg19::chr14:101531637..101531715+
hsa-miR-409-3p	MIMAT0001639	Prostate Epithelial Cells (polarized), donor1	hg19::chr14:101531637..101531715+
hsa-miR-409-3p	MIMAT0001639	Prostate Epithelial Cells, donor2	hg19::chr14:101531637..101531715+
hsa-miR-409-3p	MIMAT0001639	Prostate Epithelial Cells, donor3	hg19::chr14:101531637..101531715+
hsa-miR-409-3p	MIMAT0001639	Prostate Stromal Cells, donor1	hg19::chr14:101531637..101531715+
hsa-miR-409-3p	MIMAT0001639	Prostate Stromal Cells, donor2	hg19::chr14:101531637..101531715+
hsa-miR-409-3p	MIMAT0001639	Prostate Stromal Cells, donor3	hg19::chr14:101531637..101531715+
hsa-miR-409-3p	MIMAT0001639	Renal Cortical Epithelial Cells, donor1	hg19::chr14:101531637..101531715+
hsa-miR-409-3p	MIMAT0001639	Renal Epithelial Cells, donor1	hg19::chr14:101531637..101531715+
hsa-miR-409-3p	MIMAT0001639	Renal Epithelial Cells, donor2	hg19::chr14:101531637..101531715+
hsa-miR-409-3p	MIMAT0001639	Renal Glomerular Endothelial Cells, donor1	hg19::chr14:101531637..101531715+
hsa-miR-409-3p	MIMAT0001639	Renal Glomerular Endothelial Cells, donor2	hg19::chr14:101531637..101531715+
hsa-miR-409-3p	MIMAT0001639	Renal Mesangial Cells, donor1	hg19::chr14:101531637..101531715+
hsa-miR-409-3p	MIMAT0001639	Renal Mesangial Cells, donor2	hg19::chr14:101531637..101531715+
hsa-miR-409-3p	MIMAT0001639	Renal Proximal Tubular Epithelial Cell, donor1	hg19::chr14:101531637..101531715+
hsa-miR-409-3p	MIMAT0001639	Renal Proximal Tubular Epithelial Cell, donor2	hg19::chr14:101531637..101531715+
hsa-miR-409-3p	MIMAT0001639	Renal Proximal Tubular Epithelial Cell, donor3	hg19::chr14:101531637..101531715+
hsa-miR-409-3p	MIMAT0001639	Retinal Pigment Epithelial Cells, donor0	hg19::chr14:101531637..101531715+
hsa-miR-409-3p	MIMAT0001639	Retinal Pigment Epithelial Cells, donor1	hg19::chr14:101531637..101531715+
hsa-miR-409-3p	MIMAT0001639	Retinal Pigment Epithelial Cells, donor2	hg19::chr14:101531637..101531715+
hsa-miR-409-3p	MIMAT0001639	Saos-2 osteosarcoma treated with ascorbic acid and BGP to induce calcification, 00hr00min, biol_rep1 (A1 T0)	hg19::chr14:101531637..101531715+
hsa-miR-409-3p	MIMAT0001639	Saos-2 osteosarcoma treated with ascorbic acid and BGP to induce calcification, 00hr00min, biol_rep2 (A2 T0)	hg19::chr14:101531637..101531715+
hsa-miR-409-3p	MIMAT0001639	Saos-2 osteosarcoma treated with ascorbic acid and BGP to induce calcification, 00hr00min, biol_rep3 (A3 T0)	hg19::chr14:101531637..101531715+
hsa-miR-409-3p	MIMAT0001639	Saos-2 osteosarcoma treated with ascorbic acid and BGP to induce calcification, 01hr00min, biol_rep1 (A1 T4)	hg19::chr14:101531637..101531715+
hsa-miR-409-3p	MIMAT0001639	Saos-2 osteosarcoma treated with ascorbic acid and BGP to induce calcification, 01hr00min, biol_rep2 (A2 T4)	hg19::chr14:101531637..101531715+
hsa-miR-409-3p	MIMAT0001639	Saos-2 osteosarcoma treated with ascorbic acid and BGP to induce calcification, 01hr00min, biol_rep3 (A3 T4)	hg19::chr14:101531637..101531715+
hsa-miR-409-3p	MIMAT0001639	Saos-2 osteosarcoma treated with ascorbic acid and BGP to induce calcification, 24hr, biol_rep1 (A1 T12)	hg19::chr14:101531637..101531715+
hsa-miR-409-3p	MIMAT0001639	Saos-2 osteosarcoma treated with ascorbic acid and BGP to induce calcification, 24hr, biol_rep2 (A2 T12)	hg19::chr14:101531637..101531715+
hsa-miR-409-3p	MIMAT0001639	Saos-2 osteosarcoma treated with ascorbic acid and BGP to induce calcification, 24hr, biol_rep3 (A3 T12)	hg19::chr14:101531637..101531715+
hsa-miR-409-3p	MIMAT0001639	Saos-2 osteosarcoma treated with ascorbic acid and BGP to induce calcification, day04, biol_rep1 (A1 T13)	hg19::chr14:101531637..101531715+
hsa-miR-409-3p	MIMAT0001639	Saos-2 osteosarcoma treated with ascorbic acid and BGP to induce calcification, day04, biol_rep2 (A2 T13)	hg19::chr14:101531637..101531715+
hsa-miR-409-3p	MIMAT0001639	Saos-2 osteosarcoma treated with ascorbic acid and BGP to induce calcification, day04, biol_rep3 (A3 T13)	hg19::chr14:101531637..101531715+
hsa-miR-409-3p	MIMAT0001639	Saos-2 osteosarcoma treated with ascorbic acid and BGP to induce calcification, day28, biol_rep1 (A1 T17)	hg19::chr14:101531637..101531715+
hsa-miR-409-3p	MIMAT0001639	Saos-2 osteosarcoma treated with ascorbic acid and BGP to induce calcification, day28, biol_rep2 (A2 T17)	hg19::chr14:101531637..101531715+
hsa-miR-409-3p	MIMAT0001639	Saos-2 osteosarcoma treated with ascorbic acid and BGP to induce calcification, day28, biol_rep3 (A3 T17)	hg19::chr14:101531637..101531715+
hsa-miR-409-3p	MIMAT0001639	Schwann Cells, donor1	hg19::chr14:101531637..101531715+
hsa-miR-409-3p	MIMAT0001639	Sebocyte, donor1	hg19::chr14:101531637..101531715+
hsa-miR-409-3p	MIMAT0001639	Sebocyte, donor2	hg19::chr14:101531637..101531715+
hsa-miR-409-3p	MIMAT0001639	Sebocyte, donor3	hg19::chr14:101531637..101531715+
hsa-miR-409-3p	MIMAT0001639	Sertoli Cells, donor1	hg19::chr14:101531637..101531715+
hsa-miR-409-3p	MIMAT0001639	Sertoli Cells, donor2	hg19::chr14:101531637..101531715+
hsa-miR-409-3p	MIMAT0001639	Skeletal muscle cells differentiated into Myotubes - multinucleated, donor1	hg19::chr14:101531637..101531715+
hsa-miR-409-3p	MIMAT0001639	Skeletal muscle cells differentiated into Myotubes - multinucleated, donor2	hg19::chr14:101531637..101531715+
hsa-miR-409-3p	MIMAT0001639	Skeletal Muscle Cells, donor1	hg19::chr14:101531637..101531715+
hsa-miR-409-3p	MIMAT0001639	Skeletal Muscle Cells, donor2	hg19::chr14:101531637..101531715+
hsa-miR-409-3p	MIMAT0001639	Skeletal Muscle Cells, donor3	hg19::chr14:101531637..101531715+
hsa-miR-409-3p	MIMAT0001639	Skeletal Muscle Satellite Cells, donor1	hg19::chr14:101531637..101531715+
hsa-miR-409-3p	MIMAT0001639	Skeletal Muscle Satellite Cells, donor2	hg19::chr14:101531637..101531715+
hsa-miR-409-3p	MIMAT0001639	Skeletal Muscle Satellite Cells, donor3	hg19::chr14:101531637..101531715+
hsa-miR-409-3p	MIMAT0001639	Small Airway Epithelial Cells, donor1	hg19::chr14:101531637..101531715+
hsa-miR-409-3p	MIMAT0001639	Small Airway Epithelial Cells, donor2	hg19::chr14:101531637..101531715+
hsa-miR-409-3p	MIMAT0001639	Small Airway Epithelial Cells, donor3	hg19::chr14:101531637..101531715+
hsa-miR-409-3p	MIMAT0001639	Small Airway Epithelial Cells, donor3 (nuclear fraction)	hg19::chr14:101531637..101531715+
hsa-miR-409-3p	MIMAT0001639	Smooth Muscle Cells - Aortic, donor0	hg19::chr14:101531637..101531715+
hsa-miR-409-3p	MIMAT0001639	Smooth Muscle Cells - Aortic, donor0 (nuclear fraction)	hg19::chr14:101531637..101531715+
hsa-miR-409-3p	MIMAT0001639	Smooth Muscle Cells - Aortic, donor1	hg19::chr14:101531637..101531715+
hsa-miR-409-3p	MIMAT0001639	Smooth Muscle Cells - Aortic, donor2	hg19::chr14:101531637..101531715+
hsa-miR-409-3p	MIMAT0001639	Smooth Muscle Cells - Brachiocephalic, donor1	hg19::chr14:101531637..101531715+
hsa-miR-409-3p	MIMAT0001639	Smooth Muscle Cells - Brachiocephalic, donor2	hg19::chr14:101531637..101531715+
hsa-miR-409-3p	MIMAT0001639	Smooth Muscle Cells - Brachiocephalic, donor3	hg19::chr14:101531637..101531715+
hsa-miR-409-3p	MIMAT0001639	Smooth Muscle Cells - Brain Vascular, donor1	hg19::chr14:101531637..101531715+
hsa-miR-409-3p	MIMAT0001639	Smooth Muscle Cells - Brain Vascular, donor2	hg19::chr14:101531637..101531715+
hsa-miR-409-3p	MIMAT0001639	Smooth Muscle Cells - Brain Vascular, donor3	hg19::chr14:101531637..101531715+
hsa-miR-409-3p	MIMAT0001639	Smooth Muscle Cells - Bronchial, donor1	hg19::chr14:101531637..101531715+
hsa-miR-409-3p	MIMAT0001639	Smooth Muscle Cells - Carotid, donor1	hg19::chr14:101531637..101531715+
hsa-miR-409-3p	MIMAT0001639	Smooth Muscle Cells - Carotid, donor2	hg19::chr14:101531637..101531715+
hsa-miR-409-3p	MIMAT0001639	Smooth Muscle Cells - Colonic, donor1	hg19::chr14:101531637..101531715+
hsa-miR-409-3p	MIMAT0001639	Smooth Muscle Cells - Colonic, donor2	hg19::chr14:101531637..101531715+
hsa-miR-409-3p	MIMAT0001639	Smooth Muscle Cells - Colonic, donor3	hg19::chr14:101531637..101531715+
hsa-miR-409-3p	MIMAT0001639	Smooth Muscle Cells - Coronary Artery, donor1	hg19::chr14:101531637..101531715+
hsa-miR-409-3p	MIMAT0001639	Smooth Muscle Cells - Coronary Artery, donor2	hg19::chr14:101531637..101531715+
hsa-miR-409-3p	MIMAT0001639	Smooth Muscle Cells - Coronary Artery, donor3	hg19::chr14:101531637..101531715+
hsa-miR-409-3p	MIMAT0001639	Smooth Muscle Cells - Esophageal, donor1	hg19::chr14:101531637..101531715+
hsa-miR-409-3p	MIMAT0001639	Smooth Muscle Cells - Internal Thoracic Artery, donor1	hg19::chr14:101531637..101531715+
hsa-miR-409-3p	MIMAT0001639	Smooth Muscle Cells - Internal Thoracic Artery, donor2	hg19::chr14:101531637..101531715+
hsa-miR-409-3p	MIMAT0001639	Smooth Muscle Cells - Internal Thoracic Artery, donor3	hg19::chr14:101531637..101531715+
hsa-miR-409-3p	MIMAT0001639	Smooth Muscle Cells - Prostate, donor1	hg19::chr14:101531637..101531715+
hsa-miR-409-3p	MIMAT0001639	Smooth Muscle Cells - Prostate, donor2	hg19::chr14:101531637..101531715+
hsa-miR-409-3p	MIMAT0001639	Smooth Muscle Cells - Prostate, donor3	hg19::chr14:101531637..101531715+
hsa-miR-409-3p	MIMAT0001639	Smooth Muscle Cells - Pulmonary Artery, donor1	hg19::chr14:101531637..101531715+
hsa-miR-409-3p	MIMAT0001639	Smooth Muscle Cells - Pulmonary Artery, donor2	hg19::chr14:101531637..101531715+
hsa-miR-409-3p	MIMAT0001639	Smooth Muscle Cells - Pulmonary Artery, donor3	hg19::chr14:101531637..101531715+
hsa-miR-409-3p	MIMAT0001639	Smooth Muscle Cells - Subclavian Artery, donor1	hg19::chr14:101531637..101531715+
hsa-miR-409-3p	MIMAT0001639	Smooth Muscle Cells - Subclavian Artery, donor2	hg19::chr14:101531637..101531715+
hsa-miR-409-3p	MIMAT0001639	Smooth Muscle Cells - Subclavian Artery, donor3	hg19::chr14:101531637..101531715+
hsa-miR-409-3p	MIMAT0001639	Smooth Muscle Cells - Tracheal, donor1	hg19::chr14:101531637..101531715+
hsa-miR-409-3p	MIMAT0001639	Smooth Muscle Cells - Umbilical Artery, donor0	hg19::chr14:101531637..101531715+
hsa-miR-409-3p	MIMAT0001639	Smooth Muscle Cells - Umbilical Artery, donor1	hg19::chr14:101531637..101531715+
hsa-miR-409-3p	MIMAT0001639	Smooth Muscle Cells - Umbilical Artery, donor2	hg19::chr14:101531637..101531715+
hsa-miR-409-3p	MIMAT0001639	Smooth Muscle Cells - Umbilical Artery, donor3	hg19::chr14:101531637..101531715+
hsa-miR-409-3p	MIMAT0001639	Smooth Muscle Cells - Uterine, donor1	hg19::chr14:101531637..101531715+
hsa-miR-409-3p	MIMAT0001639	Smooth Muscle Cells - Uterine, donor3	hg19::chr14:101531637..101531715+
hsa-miR-409-3p	MIMAT0001639	spinal cord, adult, donor10252	hg19::chr14:101531637..101531715+
hsa-miR-409-3p	MIMAT0001639	Synoviocyte, donor1	hg19::chr14:101531637..101531715+
hsa-miR-409-3p	MIMAT0001639	Synoviocyte, donor2	hg19::chr14:101531637..101531715+
hsa-miR-409-3p	MIMAT0001639	Synoviocyte, donor3	hg19::chr14:101531637..101531715+
hsa-miR-409-3p	MIMAT0001639	Trabecular Meshwork Cells, donor1	hg19::chr14:101531637..101531715+
hsa-miR-409-3p	MIMAT0001639	Trabecular Meshwork Cells, donor2	hg19::chr14:101531637..101531715+
hsa-miR-409-3p	MIMAT0001639	Tracheal Epithelial Cells, donor2	hg19::chr14:101531637..101531715+
hsa-miR-409-3p	MIMAT0001639	Tracheal Epithelial Cells, donor3	hg19::chr14:101531637..101531715+
hsa-miR-409-3p	MIMAT0001639	Urothelial Cells, donor0	hg19::chr14:101531637..101531715+
hsa-miR-409-3p	MIMAT0001639	Urothelial Cells, donor1	hg19::chr14:101531637..101531715+
hsa-miR-409-3p	MIMAT0001639	Urothelial Cells, donor2	hg19::chr14:101531637..101531715+
